# Supplementary material for: Assessing residents’ knowledge of patient satisfaction: a cross-sectional study at a large academic medical centre
Source: PubMed Central journal article supplement — BMJ Open. 2017 Aug 21;7(8):e017100. doi: 10.1136/bmjopen-2017-017100 (PMC5724205; doi:10.1136/bmjopen-2017-017100), 2017-08-21
Supplement: bmjopen-2017-017100.draft_revisions.pdf [file bmjopen-2017-017100.draft_revisions.pdf]

# BMJ Open

BMJ Open is committed to open peer review. As part of this commitment we make the peer review history of every article we publish publicly available.

When an article is published we post the peer reviewers' comments and the authors' responses online. We also post the versions of the paper that were used during peer review. These are the versions that the peer review comments apply to.

The versions of the paper that follow are the versions that were submitted during the peer review process. They are not the versions of record or the final published versions. They should not be cited or distributed as the published version of this manuscript.

BMJ Open is an open access journal and the full, final, typeset and author-corrected version of record of the manuscript is available on our site with no access controls, subscription charges or pay-per-view fees (<http://bmjopen.bmj.com>).

If you have any questions on BMJ Open's open peer review process please email [info.bmjopen@bmj.com](mailto:info.bmjopen@bmj.com)

# BMJ Open

## Identifying Gaps in Resident Knowledge of Patient Satisfaction

|                                 |                                                                                                                                                                                                                                                                                                                                                                                                           |
|---------------------------------|-----------------------------------------------------------------------------------------------------------------------------------------------------------------------------------------------------------------------------------------------------------------------------------------------------------------------------------------------------------------------------------------------------------|
| Journal:                        | <i>BMJ Open</i>                                                                                                                                                                                                                                                                                                                                                                                           |
| Manuscript ID                   | bmjopen-2017-017100                                                                                                                                                                                                                                                                                                                                                                                       |
| Article Type:                   | Research                                                                                                                                                                                                                                                                                                                                                                                                  |
| Date Submitted by the Author:   | 06-Apr-2017                                                                                                                                                                                                                                                                                                                                                                                               |
| Complete List of Authors:       | Stewart, Diana; Baylor College of Medicine, Internal Medicine and Pediatrics; Michael E. DeBakey VA Medical Center<br>Dang, B.N.; Michael E. DeBakey VA Medical Center; Baylor College of Medicine, Section of Health Services Research<br>Wells Trautner, Barbara<br>Cai, Cecilia ; Baylor College of Medicine<br>Torres, Sergio; Baylor College of Medicine<br>Turner, Teri; Baylor College of Medicine |
| <b>Primary Subject Heading</b>: | Medical education and training                                                                                                                                                                                                                                                                                                                                                                            |
| Secondary Subject Heading:      | Medical management                                                                                                                                                                                                                                                                                                                                                                                        |
| Keywords:                       | Quality in health care < HEALTH SERVICES ADMINISTRATION & MANAGEMENT, INTERNAL MEDICINE, MEDICAL EDUCATION & TRAINING, PAEDIATRICS                                                                                                                                                                                                                                                                        |
|                                 |                                                                                                                                                                                                                                                                                                                                                                                                           |

SCHOLARONE™  
Manuscripts

Only

**Title:** Identifying Gaps in Resident Knowledge of Patient Satisfaction

**Authors:** Diana E. Stewart, MD, MBA<sup>1,3,4</sup>, Bich N. Dang, MD<sup>1,2,3</sup>, Barbara Trautner, MD, Ph. D<sup>1,2,3</sup>, Cecilia Cai<sup>1</sup>, Sergio Torres, MD<sup>1</sup>, Terri Turner, MD, MPH, M. Ed<sup>4,5</sup>

**Author Affiliations:** <sup>1</sup>Section of General Internal Medicine, and <sup>2</sup>Section of Health Services Research, Department of Medicine, Baylor College of Medicine, Houston, Texas, USA.

<sup>3</sup>Michael E. DeBakey Veteran Affairs Medical Center, Houston, Texas, USA.

<sup>4</sup>Department of Pediatrics, Baylor College of Medicine, Houston, Texas, USA

<sup>5</sup>Center for Research, Innovation, and Scholarship in Medical Education, Texas Children's Hospital, Houston, Texas, USA.

**Author Roles:** **Diana Stewart, MD, MBA** is an assistant professor and hospitalist, Department of Pediatrics-Hospital Medicine and Department of Internal Medicine, Baylor College of Medicine in Houston, TX. **Bich N. Dang, MD** is an assistant professor in the Department of Medicine-Section of Infectious Disease, Baylor College of Medicine and a clinical investigator with the Center for Innovations in Quality, Effectiveness and Safety at the Michael E. DeBakey VA Medical Center in Houston, TX. **Barbara W. Trautner, MD, PhD** is an infectious diseases clinician-investigator focused on prevention of healthcare associated infections and antibiotic stewardship with the Center for Innovations in Quality, Effectiveness and Safety at the Michael E. DeBakey VA Medical Center and Department of Medicine, Baylor College of Medicine in Houston, TX. **Cecilia Cai** is a medical student at Baylor College of Medicine, Houston, Texas. **Sergio Torres, MD** is an assistant professor and hospitalist, Department of Internal Medicine, Baylor College of Medicine, Houston, TX. **Teri Turner, MD, MPH, M. Ed** is an associate professor, Department of Pediatrics at Baylor College of Medicine, and director, Center for Research, Innovation, and Scholarship in Medical Education, Texas Children's Hospital, Houston, Texas.

**Contributors:** Obtained funding: DS and TT. Study concept and questionnaire design: DS, BD, BT, CC, ST, TT. Acquisition of data: DS, CC, TT. Analysis and interpretation of data: DS, BD, BT, TT. All authors participated in writing the manuscript, reviewed it for content, take responsibility for the integrity of the data and accuracy of the data analysis, and approved the final version.

**Key words:** Quality improvement, graduate medical education, patient satisfaction, patient experience

**Acknowledgements:** The authors thank Dr. Lee Ligon, Center for Research, Innovation and Scholarship, Department of Pediatrics, Baylor College of Medicine, for editorial assistance.

We presented an earlier version of the manuscript as a poster at the Baylor College of Medicine Quality Improvement Symposium in May 2015.

Word count for structured abstract: 296

Word count for manuscript: 3300

1  
2  
3  
4  
5  
6  
7  
8 **Corresponding Author Information:**  
9

10 Diana Stewart, MD, MBA

11  
12 Assistant Professor

13  
14 1102 Bates Street, FC 1860

15  
16  
17 Houston, TX 77030

18  
19  
20 Office Phone: 832-824-5447

21  
22 Fax: 832-825-5424

23  
24 E-mail: [anukwuem@bcm.edu](mailto:anukwuem@bcm.edu)  
25  
26  
27  
28  
29  
30  
31  
32  
33  
34  
35  
36  
37  
38  
39  
40  
41  
42  
43  
44  
45  
46  
47  
48  
49  
50  
51  
52  
53  
54  
55  
56  
57  
58  
59  
60

## Abstract

### Objectives

Patient satisfaction healthcare quality and outcomes. Residents play an important role in patient satisfaction at academic institutions. This study aims to assess residents' patient satisfaction knowledge and determine which learning experiences contributed to their knowledge.

### Settings

This study was conducted at a large urban, tertiary care academic medical center in the United States.

### Participants

All residents from internal medicine (n= 185) and pediatrics (n=156) were asked to participate.

### Design

Residents completed a survey from April 2013 to December 2013. The survey assessed: (1) knowledge of factors that impact satisfaction and (2) learning experiences that may have contributed to residents' understanding of the drivers of patient satisfaction (e.g. experiential (personal or clinical) or didactics). Trainees identified the importance of factors in determining patient satisfaction on a 5-point Likert scale; answers were compiled into a knowledge score. The score was correlated with prior personal/clinical experience and didactics.

### Results

Of 341 residents, 247 (72%) completed the survey. No difference was found in knowledge among training levels or residency programs. More than 50% incorrectly thought board certification, patient education, patient income, and physician age impacted satisfaction. Personal experience, through hospitalization of a relative or friend, was correlated with higher knowledge (67% vs. 71%,  $p=.03$ ). Ninety-nine percent (n=238) stated peer observation, and all stated faculty feedback impacted their patient satisfaction knowledge. Seventy-seven percent (n=185) had attended didactics on satisfaction, but attendance did not correlate with higher scores.

### Conclusions

Care provided by residents impacts patient satisfaction and hospital quality metrics. Our study showed trainees have a few gaps in their patient satisfaction knowledge and attending past educational sessions on patient satisfaction did not correlate with higher knowledge scores. Our data suggests that academic centers should leverage residents' personal experiences, their observations of peers, and faculty feedback to enhance patient satisfaction knowledge.

### Strengths and Limitations of this Study

- Residents serve a dual role as providers and learners in academic settings and can greatly influence hospital quality metrics, specifically patient satisfaction. However, few studies have assessed resident knowledge in patient satisfaction and attempted to determine which types of learning experiences correlate with residents' knowledge.
- Recognizing resident knowledge gaps in patient satisfaction allows hospital administrators and academic institutions to develop targeted, practical, and sustainable interventions to augment trainee knowledge and improve the patient care experience and reimbursement.
- Residents' patient satisfaction knowledge score was impacted by experiential learning specifically hospitalization of a close contact, peer and faculty observation, and faculty evaluations.
- Even though a large training program with multiple educational clinical sites was analyzed, the study was performed at a single academic center.
- Residents' knowledge scores were not correlated with resident clinical performance, including provider satisfaction scores or patient evaluation of resident, due to the anonymity of the survey.

## Background

Patient satisfaction is an important component of patient-centered care; it is linked to healthcare quality and associated with improved compliance and adherence.<sup>1-5</sup> Patient satisfaction and patient experience has received even greater emphasis in health care institutions in the United States (US) since the Affordable Care Act (a comprehensive healthcare reform act in the United States enacted in 2010), as a hospital's reimbursement is impacted by the value of care it provides rather than traditional fee for service. The "value" is calculated by the hospital's value-based total performance score, which includes several domains, one of which is patient satisfaction.<sup>6,7</sup> Although value-based care purchasing applies to only the Center for Medicare and Medicaid Services (CMS), other private payers have added satisfaction scores to their pay-for-performance measures.<sup>6</sup> For CMS, 25% of value-based purchasing will be based on the results of Hospital Consumer Assessment of Healthcare Providers and Systems (HCAHPS), an instrument to assess patient satisfaction.<sup>8-10</sup> With such an emphasis on payment and the link to patient satisfaction and improved patient outcomes, it is incumbent upon all caregivers, particularly physicians in training, to understand what contributes to patients being satisfied with their care.

Many factors, such as responsiveness, communication, and interpersonal manner of caregivers, are positive determinants, or drivers, of patient satisfaction; however, whether trainees are aware of these factors remains unclear.<sup>2</sup> Functioning as both learners and providers, residents are important to the framework, quality, and outcomes of the health care delivered in an academic setting, specifically patient satisfaction.<sup>11-12</sup> Even though residents may have been taught some components of patient satisfaction in medical school; teaching and learning are not interchangeable.<sup>13-16</sup> Prior studies have assessed interventions targeting residents to improve patient satisfaction, such as generalized education and incentives, but the literature regarding residents' current knowledge of patient satisfaction is sparse.<sup>10</sup> To develop practical, cost-effective, sustainable interventions that benefit the trainee as well as the institution, understanding the gaps in residents' knowledge regarding drivers or positive determinants of patient satisfaction is critical and a necessary first step to changing their practice. The primary study aim was to assess residents' knowledge of factors strongly correlated with patient satisfaction, termed "drivers." A secondary aim was to determine which types of learning experiences (didactic, personal, or clinical experiences) most strongly correlate with residents' knowledge.

## Methods

### *Setting and Participants*

This study was conducted at a large urban, tertiary care academic medical center in Houston, Texas, USA; one of the most diverse cities in the US. The medical center is the largest complex in the US with 56 member institutions and over 9,000 hospital beds. All residents from internal medicine (n= 185) and pediatrics (n=156) were asked to participate. This was a convenience sample of primary care residents, in which a large percentage of care involves communicating and interacting directly with patients daily. Residents from the internal medicine and pediatric programs train about 40% of the residents at our institutions and it was felt that if differences could be detected the larger sample size afforded by these programs would be beneficial in this assessment.

Residents do not train in one primary university-affiliated training hospital. Rather, these training programs offer a breadth of exposure to outpatient and inpatient care across private, Veterans Affairs, and county hospitals, and patients from various socioeconomic and cultural backgrounds.

### *Participant Exposure to Patient Satisfaction Metrics*

Supervising physicians regularly receive data on the various institution's satisfaction metrics or scores. To collect this patient satisfaction data, the affiliates partner with a third-party vendor, a private organization whose questionnaires are used by over 7000 facilities in the US, to survey patients on their experience in receiving health care at the institution. These surveys are done via phone, mail, or email and meet the requirements of CMS that utilizes the Consumer Assessment of Healthcare Providers and Systems (CAHPS) (discussed further in methods). Partnering with the third-party vendor allows the institutions to make internal and external comparisons regarding their satisfaction metrics.<sup>10,17</sup> At each institution, this information may be disseminated to residents during patient rounds, morning reports, or noon conferences. Some of the affiliated training institutions have patient experience initiatives that residents will be exposed to when they rotate through the hospital; however, this will vary. For instance, residents who rotate on the pediatric hospital medicine service at the pediatric affiliate hospital participate in family centered-rounds, an interprofessional, patient-centered rounding practice that involves patients, nurses, and providers.

Residents get feedback on their clinical performance, but may infrequently receive the data on the hospital unit or clinic's patient satisfaction scores due to their rotation schedules. Residents are on each inpatient or outpatient rotation for only four weeks and the satisfaction data is usually reviewed monthly or quarterly. Medicine-pediatric and pediatric residents do have a patient and nursing evaluation done of their performance, but these surveys are usually reviewed in a summative manner, twice annually to promote open and honest feedback from the support staff.

Moreover, patient satisfaction exposure at the clinical site is variable in degree and frequency for each resident and therefore difficult to quantify given the differences in each training site and program. It is also unclear if supervising physicians pervasively acknowledge and disseminate the data to residents.

### *Survey Instrument*

A 31-item survey was developed through review of patient satisfaction literature, prior surveys, and published work.<sup>2,19-24</sup> The questionnaire focused on three concepts: (1) knowledge of factors that influence patient satisfaction, (2) personal and clinical experiences contributing to a resident's satisfaction knowledge, and (3) prior educational sessions (didactics) received related to patient satisfaction. The questionnaire was developed through an iterative process that incorporated a psychometrician, health services researchers, and residency program faculty. Pilot testing using a think-aloud process was conducted with a group of internal medicine residents who were not part of the study. Internal assessment and feedback from these individuals improved the clarity of the items and general format.

**Knowledge of Factors Impacting Patient Satisfaction.** Questions 1-20 assessed knowledge of the factors related to patient satisfaction, using a 5-point Likert-type scale (1 = not at all important to 5 = extremely important) (See Appendix 1 for Survey Instrument). For this study, patient satisfaction knowledge will refer to knowledge of the drivers of patient satisfaction assessed by the survey instrument. Crow et al. reviewed 139 international articles and 127 data sets and concluded that determinants of patient satisfaction can be broken down into two groups: characteristics of the health care delivery system and patient.<sup>2</sup> For many US institutions, patient experience is a surrogate marker of patient safety satisfaction, therefore the current validated surveys that assesses patient satisfaction were reviewed for themes as well and author's prior work.<sup>9,19,22-24</sup> CMS uses the Consumer Assessment of Healthcare



1  
2  
3 Providers and Systems (CAHPS) surveys to assess patient satisfaction in different settings; by 2017, 25%  
4 of value-based purchasing will be based on the results of HCAHPS.<sup>9,19</sup> These surveys are developed and  
5 maintained by the U.S. Agency for Healthcare Research and Quality (AHRQ) and have been validated.  
6 HCAP surveys patients based on 6 areas: communication with physicians, communication with nurses,  
7 communication about medications, quality of nursing services, adequacy of planning for discharge, and  
8 pain management.<sup>8,9,19</sup>  
9

10  
11 The Hospital CAHPS (HCAHPS) survey, the Clinician and Group CAHPS (CG-CAHPS) for outpatient use, the  
12 Patient Satisfaction Questionnaire (PSQ) from Rand Health, all well-known validated instruments that  
13 assess patient satisfaction via patient experience, were reviewed for important determinants of patient  
14 satisfaction.<sup>19-20</sup> Using these surveys and published literature, 5 domains of patient satisfaction were  
15 identified and assessed in the knowledge portion of the survey (Table 1).<sup>2,19-24</sup> To minimize bias and limit  
16 survey length, the final survey included 11 variables consistently related to patient satisfaction and 9  
17 non-drivers that are commonly presumed to affect satisfaction but have been shown to not be  
18 associated.<sup>2,19-24</sup> Inclusion of commonly mistaken non-drivers in the survey were done because the  
19 authors thought it was important to also know where the current misconceptions are regarding patient  
20 satisfaction. An answer was correct if the resident strongly identified whether the item was related to  
21 patient satisfaction (answer of 4 or 5 for true variables/drivers and an answer of 1 or 2 for the non-  
22 drivers/false variables). Other responses were deemed incorrect (answer of 1, 2 or 3 for true  
23 variables/drivers and an answer of 3, 4 or 5 for the non-drivers/false variables). Selection of "3" for  
24 either category was regarded as a neutral response. Scoring was dichotomized to either correct or  
25 incorrect and was reported as a proportion of 100 percent (e.g. 10 correct answers = 50%).  
26  
27  
28  
29

30 **Experiential Learning: Personal and Clinical Experiences.** Questions 21-27 explored personal and clinical  
31 experiences that may impact knowledge of patient satisfaction. The personal experiences focused on  
32 personal or relative/friend's hospitalization. Clinical experiences included clinical observations of faculty  
33 and peers with patients as well as feedback from evaluations of faculty, nurses, or patients. All these  
34 experiences were assessed independently. This portion was assessed using a 4-point Likert scale (1 = no  
35 impact to 4 = large impact; 0 = not applicable). The respondents were dichotomized into two groups:  
36 those who had the specific experience (response of 1 to 4) and those who did not (response of not  
37 applicable). Each experience item was analyzed as a continuous variable (degree of impact) and a  
38 categorical variable (dichotomized into those who had the specific experience and those who did not).  
39 For this analysis, the degree of impact and the dichotomized responses were correlated with the  
40 knowledge score.  
41  
42

43 **Educational Sessions (Structured Didactics) on Patient Satisfaction.** Questions 28-30 explored how  
44 often residents had received prior didactics on patient satisfaction. Respondents were asked to  
45 approximate how many times they had received an education session on patient satisfaction in medical  
46 school or residency. The last question of this section assessed how these didactics were given (e.g.  
47 lecture, workshops, or hospital orientation). Responses to this section were correlated with the  
48 knowledge score.  
49  
50

51  
52 The final question asked residents to respond to the statement, "I am confident that my patients are  
53 satisfied with the care I provide." Responses were based on a 5-point Likert scale (1 = strongly disagree  
54 to 5 = agree). Demographic data also were collected on participants.  
55  
56  
57  
58  
59  
60

### Survey distribution

A member of the research team administered an anonymous survey at resident teaching conferences from April 2013 to December 2013. Each completed survey was assigned a unique study number. Respondents were monitored to prevent duplicate submissions. Participation in the survey was voluntary and no penalty was given for not participating; incentives were not given.

### Statistical Analysis

Descriptive statistics were computed on demographic data. Frequencies and mean scores (including trainee year and program type) were compared using ANOVA. Point-biserial correlation was used to assess the correlation between the knowledge score and each type of learning experience (didactic or experiential (personal or clinical experiences with hospitalization)). Frequencies and means of the knowledge score stratified by type of learning experiences were also compared using ANOVA. Spearman's rho was used to assess the correlation between knowledge score and the degree of impact of the experiences. Data were analyzed using IBM SPSS Statistics version 23.

The study was approved by the Institutional Review Board and the Research and Development Committee.

### Results

112 of 156 pediatric residents (72%) and 135 of 185 medicine residents (73%) completed the survey. We analyzed 239 surveys, excluding 8 for incomplete data. Internal medicine-pediatrics residents were grouped with the medicine residents. See Table 2 for demographics.

**Knowledge of Factors Impacting Patient Satisfaction.** Knowledge scores are shown in Table 3. The mean score was 70%. More upper-level residents incorrectly rated physician rank in medical school as a contributor to satisfaction ( $p = 0.02$ ); otherwise, there were no differences in scores among trainee levels. Additionally, no difference was noted in knowledge scores when comparing pediatrics, internal medicine, or med-peds (the mean score ranged from 68-70%). In general, recognition of the correct drivers of patient satisfaction was high (80%), except for recognizing that patients' health status and age and the patients' rating of the nurses' discussion about treatment are important drivers (Table 3).<sup>2</sup> More than half of all residents incorrectly reported the following were drivers of patient satisfaction: physician age, patient income, board certification, and patient level of education.

**Experiential learning: Personal and clinical experiences.** Of 239 respondents, 87 (36%) had been hospitalized, and 187 (78%) had experienced hospitalization with a family member or friend. Hospitalization of a family member or friend was significantly correlated with higher knowledge of patient satisfaction drivers ( $p=.03$ ). A significant relationship was not seen when assessing a trainee's own hospitalization.

The majority stated that observing peers ( $n = 238$ ), observing supervisors ( $n = 239$ ), and receiving feedback from faculty evaluations ( $n = 233$ ), influenced their understanding of what affects patient satisfaction (99, 100, and 97%, respectively); these experiences did not correlate significantly with a higher knowledge score when dichotomized to those who had the experience compared to those who did not. When examining the level of impact (1 to 4) of these observations, higher impact ratings for

1  
2  
3  
4  
5  
6  
7  
8  
9  
10  
11  
12  
13  
14  
15  
16  
17  
18  
19  
20  
21  
22  
23  
24  
25  
26  
27  
28  
29  
30  
31  
32  
33  
34  
35  
36  
37  
38  
39  
40  
41  
42  
43  
44  
45  
46  
47  
48  
49  
50  
51  
52  
53  
54  
55  
56  
57  
58  
59  
60

faculty evaluations was the only factor that correlated with significantly higher knowledge scores, but the correlation was weak ( $p < .05$ , correlation coefficient .13; spearman rho correlation). Feedback from nurses and patients via evaluations did not significantly correlate with higher knowledge scores. Of note, only 55% ( $n=132$ ) and 56% ( $n=134$ ) of trainees reported feedback from nurses and patients, respectively, impacted their patient satisfaction knowledge.

**Structured Didactics on Patient Satisfaction.** Of 239 respondents, 185 (77%) had attended an educational session on patient satisfaction. No significant difference was found in the knowledge score of those who had attended a session compared to those who had not. Almost half (47.5%) did not attend an educational session during residency, whereas only 67% had attended a session during medical school ( $n=161$ ). Nonetheless, 88% ( $n= 211$ ) of respondents agreed or strongly agreed that their patients are satisfied with their care. There was no significant difference in knowledge score in residents who rated a higher level of confidence.

## Discussion

Donabedian stated that the ultimate validation of a quality of care is when an individual member of society achieves health and satisfaction.<sup>13</sup> With the move towards patient-centered care, patient satisfaction and experience are core outcomes for hospitals today.<sup>6</sup> Residents or physicians in training are important contributors to patients' experiences in academic institutions and are key determinants of patient satisfaction. We conducted a study to gauge residents' knowledge of drivers of patient satisfaction. We found the mean knowledge score for all resident levels to be 70%. Interestingly, the score did not increase with training level. Residents had difficulty recognizing that personal and demographic features of patients can affect their satisfaction. Specifically, they understood that interpersonal and communication skills are important (except for discussion about treatment by nurses), but surprisingly, they thought patients cared about board scores and board certification status.

Identifying the most common and universally accepted drivers of patient satisfaction can provide a foundation for curricula to address trainee's knowledge gaps in these areas. Knowing what residents currently know is an important first step to changing their practices.<sup>13-16</sup> Based on these results, a suggested starting point may be curricula geared towards augmenting nurse inclusion in treatment plans given this was an area of deficiency. Regarding patient features, patients with more comorbidities may have lower satisfaction scores; however how satisfaction is affected in acute illness is undetermined.<sup>2</sup> These patients have specific preferences based on their health status. Learning how to affectively decipher these preferences prior to making treatment plans is a potential focus area for future curricula.

We also investigated what factors contribute to residents' patient satisfaction knowledge to guide future educational initiatives. Most residents have not been hospitalized, which is not surprising given the average age of trainees in this study (84% were younger than 30 years). Hospitalization of a family member or friend, however, resulted in a significantly higher knowledge of patient satisfaction compared to those who did not have this experience. Even though most residents had experienced the patient's perspective on hospitalization via a relative, friend, or personal hospitalization, these experiences may not be a practical approach to guide educational initiatives for trainees who did not have these experiences. A significant relationship was not seen when assessing a trainee's own hospitalization likely given the low number of individuals who had previously been hospitalized. On the other hand, peer and faculty observations are major ways residents are taught about patient satisfaction. Faculty role modeling is known to influence resident education, specifically shaping trainees' values, attitudes, and ethics; the modeling provided by faculty behavior is known as the hidden

1  
2  
3 curriculum.<sup>25</sup> Peer observation and feedback have been shown to be useful for medical learners as well,  
4 especially in the development of professionalism, teamwork, and interprofessional skills.<sup>26-29</sup> These  
5 topics may provide a potential area of focus to augment learning on satisfaction.  
6  
7

8 We also looked at structured didactics that aim to teach residents about patient satisfaction. Although  
9 185 of 239 respondents (77%) had attended an educational session on patient satisfaction, most of  
10 these sessions were delivered in medical school, which may explain the lack of increase in knowledge  
11 with trainee years. Teaching and learning are not interchangeable and there is a complex interplay of  
12 many factors, such as attention, cognitive load, rehearsal practice, that result in knowledge being  
13 retained in long term memory. Knowledge that is not used, rehearsed or revisited is often forgotten.  
14 These factors may explain that lack of improvement in knowledge following a previous lecture on  
15 satisfaction.<sup>13-15</sup> The details of these didactic sessions were not addressed by our survey, therefore  
16 precluding the ability to make any comment on the content. A recent single-site survey found that  
17 bundled interventions that included didactics, real-time feedback on patient satisfaction scores, and  
18 monthly recognition of trainees with high scores resulted in improvement in patient satisfaction  
19 scores.<sup>18</sup> Moreover, didactics in patient satisfaction alone may not be sufficient to augment patient  
20 satisfaction knowledge and change physician behavior.  
21  
22  
23

### 24 **Limitations**

25  
26 Even though, we studied three large training programs at the same academic center in which the  
27 trainees were exposed to a breadth of clinical training sites; the study was performed at a single  
28 academic center. However, the results can be applicable to any residency training program given  
29 patient satisfaction is a metric common to all institutions and drivers of patient satisfaction are  
30 applicable to all specialties. This information can serve as a guide to the types of educational  
31 interventions to target for trainees. Additionally, the survey tool, although developed through an  
32 iterative process and pilot tested, has not previously been validated. The survey was however grounded  
33 in the literature and derived from validated survey measures of patient satisfaction developed for  
34 performance metrics purposes. Several questions asked the residents to recall previous learning  
35 experiences, either didactic or experiential, and therefore the results may also be limited by recall bias.  
36 Another limitation is the lack of correlation with the resident's clinical performance. The anonymous  
37 nature of the survey prevented us from correlating knowledge scores, experiences, and confidence of a  
38 resident with actual provider satisfaction scores or evaluations from patients, which would have enabled  
39 us to correlate knowledge with behavior. However, as the first step in understanding the trainees'  
40 experiences, the benefit of anonymity and honesty of reporting outweighed the ability to correlate  
41 knowledge with actual clinical behavior.  
42  
43  
44  
45

### 46 **Conclusion**

47  
48 Residents are important providers of medical care in academic institutions; their daily interactions with  
49 patients impact patient satisfaction and hospital quality metrics and reimbursement. We demonstrated  
50 some gaps in knowledge concerning drivers of patient satisfaction that did not vary by training year.  
51 Residents' awareness of patient satisfaction was impacted by experiential learning (clinical and  
52 personal), specifically hospitalization of a close contact, peer and faculty observation, and faculty  
53 evaluations. Hospital administrators and educators should recognize didactics alone may not be  
54 sufficient to augment trainee patient satisfaction knowledge. More consideration may need to be given  
55 to the effect of peer and faculty role modeling when developing future interventions to improve  
56 satisfaction for patients cared for by resident providers.  
57  
58  
59  
60

**Contributors:** Obtained funding: DS and TT. Study concept and questionnaire design: DS, BD, BT, CC, ST, TT. Acquisition of data: DS, CC, TT. Analysis and interpretation of data: DS, BD, BT, TT. All authors participated in writing the manuscript, reviewed it for content, take responsibility for the integrity of the data and accuracy of the data analysis, and approved the final version.

**Conflict of Interest Statement:** To the best of our knowledge, the authors of this manuscript report no conflicts of interest.

**Funding:** This material is based upon work supported by the Center for Research, Innovation, and Scholarship in Medical Education in the Department of Pediatrics at Baylor College of Medicine.

**Ethics approval:** Institutional Review Board and the Veterans Affairs Research and Development Committee.

**Data sharing statement:** No additional data are available

## References

1. Barbosa C, Balp M, Kulich K, et al. A Literature Review to Explore the Link between Treatment Satisfaction and Adherence, Compliance, and Persistence. *Patient Preference and Adherence* 2012;6:39-48.
2. Crow R, Gage H, Hampson S, et al. The Measurement of Satisfaction with Healthcare: Implications for Practice from a Systematic Review of the Literature. *Health Technol Assess* 2002; 6(32): 1-244.
3. Schneider J., Kaplan S.H., Greenfield S., et al. Better Physician-patient Relationships are Associated with Higher Reported Adherence to Antiretroviral Therapy in Patients with HIV Infection. *J Gen Intern Med* 2004; 19(11): 1096-103.
4. Van der Leeuw R, Lombarts K, Arah O, Heineman MJ. A Systematic Review of the Effects of Residency Training on Patient Outcomes. *BMC Medicine*. 2012; 10:65.
5. Fenton JJ, Jerant AF, Bertakis KD, Franks P. The cost of satisfaction: a national study of patient satisfaction, health care utilization, expenditures, and mortality. *Arch Intern Med* 2012;172(5):405–11.
6. Kassutto SM, Shah RJ. Patient Satisfaction: Why and How Patients Grade You and Your Pulmonary Practice. *Chest* 2015;148(3):833–8.
7. Conway P. Value-driven health care: Implications for hospitals and hospitalists. *J Hosp Med* 2009;4(8):507–11
8. Lindsay RW. Linking Reimbursement to Patient Satisfaction: Is the Tail Wagging the Dog? *JAMA Facial Plast Surg*. 2017 Feb 23. [Epub ahead of print]
9. Jha AK<sup>1</sup>, Orav EJ, Zheng J, Epstein AM. Patients' perception of hospital care in the United States. *N Engl J Med*. 2008 Oct 30;359(18):1921-31. Resnick AS<sup>1</sup>, Disbot M, Wurster A, Mullen JL, Kaiser LR, Morris JB.

- 1  
2  
3  
4  
5  
6  
7  
8  
9  
10  
11  
12  
13  
14  
15  
16  
17  
18  
19  
20  
21  
22  
23  
24  
25  
26  
27  
28  
29  
30  
31  
32  
33  
34  
35  
36  
37  
38  
39  
40  
41  
42  
43  
44  
45  
46  
47  
48  
49  
50  
51  
52  
53  
54  
55  
56  
57  
58  
59  
60
10. Contributions of Surgical Residents to Patient Satisfaction: Impact of Residents Beyond Clinical Care. 2008 May-Jun;65(3):243-52
  11. Dalia S and Schiffman F.J. Who's My Doctor? First-Year Residents and Patient Care: Hospitalized Patients' Perception of Their "Main Physician". *J Grad Med Educ* 2010; 2(2): 201-205.
  12. Griffith C, Rich E, Hillson S, et al. Internal Medicine Residency Training and Outcomes. *J Gen Intern Med*. 1997; 12 (6):390-396.
  13. Brown, P. C., Roediger, H. L., McDaniel, M. A. Make it stick. Harvard University Press. Cambridge, Massachusettes. 2014
  14. Schunk, D. H. Learning theories. 6<sup>th</sup> edition. New Jersey. Prentice Hall Inc. 2011
  15. Ericsson, K. A. "Acquisition and maintenance of medical expertise: A perspective from the expert-performance approach with deliberate practice." *Academic Medicine* 90.11 (2015): 1471-1486.
  16. Young, J. Q., Van Merrienboer, J., Durning, S., Ten Cate, O. (2014). Cognitive load theory: Implications for medical education: AMEE guide no. 86. *Medical teacher*, 36(5), 371-384.
  17. Press Ganey. <http://www.pressganey.com>. Accessed April 23, 2017.
  18. Banka G, Edgington S, Kyulo N, et. al. Improving patient satisfaction through physician education, feedback, and incentives. *J Hosp Med*. 2015 Aug;10(8):497-502.
  19. HCAHPS Center for Medicare and Medicaid Services. HCAHPS: Patients' Perspectives of Care Survey. <https://www.cms.gov/Medicare/Quality-Initiatives-Patient-Assessment-Instruments/HospitalQualityInits/HospitalHCAHPS.html>. Accessed October 5, 2015.
  20. Marshall, Grant N., and Ron D. Hays. The patient satisfaction questionnaire short-form (PSQ-18). Rand.org;1994.
  21. Kane Robert L. Satisfaction with Care. In: Kane R and Radosevich D. *Conducting Health Outcomes Research*. Sudbury: Jones and Bartlett Learning: 2011: 159-197.
  22. Dang BN, Westbrook RA, Hartman C, Giordano TP. Retaining HIV patients in care: the role of initial patient care experiences. *AIDS and Behavior*. In press.
  23. Dang BN, Westbrook RA, Black WC, Rodriguez-Barradas MC, Giordano TP. Examining the link between patient satisfaction and adherence to HIV care: A structural equation model. *PLoS ONE*. Jan 2013;8(1): e54729.
  24. Dang BN, Westbrook RA, Rodriguez-Barradas MC, Giordano TP. Identifying drivers of overall satisfaction in patients receiving HIV primary care: A cross-sectional study. *PLoS ONE*. Aug 2012;7(8): e42980.



1  
2  
3 25. Boerebach B, Lombarts K, Keijzer C, et. al. The Teacher, the Physician and the Person: How Faculty's  
4 Teaching Performance Influences Their Role Modeling. PLoS One. 2012; 7(3): e32089

5  
6  
7 26. De la Cruz MS, Kopec MT, Wimsatt LA. Resident Perceptions of Giving and Receiving Peer-to-Peer  
8 Feedback. J Grad Med Educ 2015;7(2):208–13.

9  
10 27. Bree K, Whicker SA, Fromme HB, et. al. Residents-as-Teachers Publications: What Can Programs  
11 Learn From the Literature When Starting a New or Refining an Established Curriculum? J Grad Med Educ.  
12 2014 June; 6(2): 237–248.  
13

14  
15  
16  
17  
18  
19  
20  
21  
22  
23  
24  
25  
26  
27  
28  
29  
30  
31  
32  
33  
34  
35  
36  
37  
38  
39  
40  
41  
42  
43  
44  
45  
46  
47  
48  
49  
50  
51  
52  
53  
54  
55  
56  
57  
58  
59  
60

For peer review only

Table 1. Domains of Patient Satisfaction and Linked Survey Question

| Driver Domains                                 | Abbreviated Survey Question              | Percentage Correct (95% CI) |
|------------------------------------------------|------------------------------------------|-----------------------------|
| Accessibility, Convenience, and Responsiveness | Responsiveness of ancillary staff        | 94.1% (90.592% to 96.627%)  |
| Communication                                  | Physician explanations                   | 96.7% (94.853% to 98.976%)  |
|                                                | Nurse willingness to listen              | 96.2% (93.203% to 98.148%)  |
|                                                | Nurse explanations                       | 80.3% (74.931% to 85.007%)  |
|                                                | Physician listening                      | 97.1% (94.293% to 98.710%)  |
|                                                | Discussion about treatment by nurses     | 67.4% (61.224% to 73.086%)  |
| Interpersonal Manner of Caregiver              | Courtesy and respect from nurses         | 92.9% (89.078% to 95.661%)  |
|                                                | Courtesy and respect from physicians     | 96.2% (93.203% to 98.148%)  |
| Personal Factors of Patient                    | Poor health status of patient            | 55.6% (49.300% to 61.861%)  |
|                                                | Age of patient                           | 15.1% (10.942% to 20.026%)  |
| Technical Quality and Care from Doctors        | Thoroughness and Competence of physician | 87.4% (82.783% to 91.210%)  |

Table 2. Demographics of Participants

| Post-graduate year (PGY)         | N (%)      |
|----------------------------------|------------|
| PGY-1                            | 118 (49.4) |
| PGY-2                            | 62 (25.9)  |
| PGY-3 and 4                      | 59 (24.7)  |
| Residency Program                | N (%)      |
| Internal Medicine                | 118 (49.4) |
| Pediatrics                       | 96 (40.2)  |
| Medicine/Pediatrics              | 14 (5.9)   |
| Other <sup>a</sup>               | 11 (4.6)   |
| Age <sup>b</sup>                 | N (%)      |
| ≤ 29                             | 201 (84.1) |
| > 29                             | 37 (15.5)  |
| Gender <sup>b</sup>              | N (%)      |
| Male                             | 95 (39.7)  |
| Female                           | 143 (59.8) |
| Ethnicity <sup>c</sup>           | N (%)      |
| Hispanic                         | 17 (7)     |
| Black                            | 11 (4.6)   |
| White                            | 118 (49.4) |
| Asian                            | 88 (37)    |
| Other                            | 5 (2)      |
| Additional training <sup>b</sup> | N (%)      |
| None                             | 206 (86.6) |
| MPH                              | 8 (3.4)    |
| MBA                              | 2 (0.8)    |
| Other                            | 22 (9.2)   |

<sup>a</sup>This category includes anesthesia, family medicine, surgery, and emergency medicine.

<sup>b</sup>One respondent did not answer.

<sup>c</sup>Two respondents did not answer this question and 2 respondents selected multiple categories.



Table 3. Results of Patient Satisfaction Knowledge Survey

| Driver or Non-Driver | Abbreviated Survey Question              | Percentage Correct (95% CI) |
|----------------------|------------------------------------------|-----------------------------|
| Driver               | Poor health status of patient            | 55.6% (49.300% to 61.861%)  |
|                      | Physician explanations                   | 96.7% (94.853% to 98.976%)  |
|                      | Responsiveness of ancillary staff        | 94.1% (90.592% to 96.627%)  |
|                      | Thoroughness and Competence of physician | 87.4% (82.783% to 91.210%)  |
|                      | Nurse willingness to listen              | 96.2% (93.203% to 98.148%)  |
|                      | Nurse explanations                       | 80.3% (74.931% to 85.007%)  |
|                      | Courtesy and respect from nurses         | 92.9% (89.078% to 95.661%)  |
|                      | Courtesy and respect from physicians     | 96.2% (93.203% to 98.148%)  |
|                      | Physician listening                      | 97.1% (94.293% to 98.710%)  |
|                      | Age of patient                           | 15.1% (10.942% to 20.026%)  |
|                      | Discussion about treatment by nurses     | 67.4% (61.224% to 73.086%)  |
| Non-driver           | Physician USMLE score                    | 92.9% (89.078% to 95.661%)  |
|                      | Income of patient                        | 48.5% (42.236% to 54.871%)  |
|                      | Physician age                            | 29.3% (23.780% to 35.296%)  |
|                      | Medical school attended                  | 74.1% (68.220% to 79.317%)  |
|                      | Board certification status of physician  | 44.8% (38.547% to 51.119%)  |
|                      | Education level of patient               | 20.9% (16.117% to 26.425%)  |
|                      | Physician rank in medical school         | 90.4% (86.129% to 93.651%)  |
|                      | Gender of patient                        | 64.4% (58.208% to 70.315%)  |
| Gender of physician  | 52.3% (45.960% to 58.587%)               |                             |

## Appendix 1: Survey Instrument

We are conducting a research study to measure residents' awareness of factors that can influence patient satisfaction. Residents, like you, are important providers of medical care in academic institutions, and as such have an impact on patient satisfaction. Given the important role you play in patient care, we want to learn what you believe affects the satisfaction of your patients with the care you provide. For pediatric patients, the survey refers to parent satisfaction only.

### Part I: Tell us about you.

1. What year are you in residency?

- PGY-1
- PGY-2
- PGY-3
- PGY-4
- Other (specify) \_\_\_\_\_

2. Type of residency program

- Internal Medicine
- Pediatrics
- Internal Medicine-Pediatrics
- Preliminary Program
- Transitional Program
- Surgery
- Obstetrics and Gynecology
- Other (specify) \_\_\_\_\_

3. What is your age range?

- Under 25
- 25-29
- 30-34
- 35 and over

4. What gender are you?

- Male
- Female

5. Are you of Hispanic or Latino origin?

- Yes
- No

6. What is your race? (Mark all that apply)

- Black or African American
- White
- Asian
- Other (specify) \_\_\_\_\_

7. Do you have additional graduate degrees?

- No
- MPH
- MBA
- Other (specify) \_\_\_\_\_

**Part II: Understanding Drivers of Patient Satisfaction**

Think about the factors listed below that may influence the satisfaction of patients with the care you provide. How important or unimportant do you consider each of the following influences on the satisfaction of your patients with your care?

|                                                         |                      |                    |           |                |                     |
|---------------------------------------------------------|----------------------|--------------------|-----------|----------------|---------------------|
| 1. Ranking of medical school that physician attended    | Not at all Important | Slightly Important | Important | Very Important | Extremely Important |
| 2. Poor health status of patient                        | Not at all Important | Slightly Important | Important | Very Important | Extremely Important |
| 3. Physician explaining tests, treatments, diagnosis    | Not at all Important | Slightly Important | Important | Very Important | Extremely Important |
| 4. Board certification status of physician              | Not at all Important | Slightly Important | Important | Very Important | Extremely Important |
| 5. Responsiveness of ancillary staff to patient's needs | Not at all Important | Slightly Important | Important | Very Important | Extremely Important |
| 6. Level of education of patient                        | Not at all Important | Slightly Important | Important | Very Important | Extremely Important |
| 7. Thoroughness and competence of physician             | Not at all Important | Slightly Important | Important | Very Important | Extremely Important |
| 8. Nurses willingness to listen to patient              | Not at all Important | Slightly Important | Important | Very Important | Extremely Important |
| 9. Physician rank in medical school                     | Not at all Important | Slightly Important | Important | Very Important | Extremely Important |
| 10. Explanations provided by nurses                     | Not at all Important | Slightly Important | Important | Very Important | Extremely Important |
| 11. Courtesy and respect from nurses                    | Not at all Important | Slightly Important | Important | Very Important | Extremely Important |
| 12. USMLE score of physician                            | Not at all Important | Slightly Important | Important | Very Important | Extremely Important |
| 13. Income level of patient                             | Not at all Important | Slightly Important | Important | Very Important | Extremely Important |
| 14. Age of physician                                    | Not at all Important | Slightly Important | Important | Very Important | Extremely Important |
| 15. Courtesy and respect from physician                 | Not at all Important | Slightly Important | Important | Very Important | Extremely Important |
| 16. Listening skills of physician                       | Not at all Important | Slightly Important | Important | Very Important | Extremely Important |
| 17. Age of patient                                      | Not at all Important | Slightly Important | Important | Very Important | Extremely Important |
| 18. Gender of patient                                   | Not at all Important | Slightly Important | Important | Very Important | Extremely Important |
| 19. Gender of physician                                 | Not at all Important | Slightly Important | Important | Very Important | Extremely Important |
| 20. Discussions about treatment provided by nurse       | Not at all Important | Slightly Important | Important | Very Important | Extremely Important |

**Part III: Personal Experiences**

1 Which of the following experiences have added to your understanding of what affects patients' satisfaction  
 2 with the care you provide? If you have not personally had any of the experiences below, please select N/A  
 3 (not applicable).  
 4  
 5

6 21. Your own hospitalization

7  
 8  N/A  No impact  Slight Impact  Moderate Impact  Large Impact  
 9

10 22. Hospitalization of a family member or friend

11  
 12  N/A  No impact  Slight Impact  Moderate Impact  Large Impact  
 13

14 23. Observation of your peer's interaction with patients (i.e. other interns or residents)

15  
 16  N/A  No impact  Slight Impact  Moderate Impact  Large Impact  
 17

18 24. Observation of supervisor's interactions with patients (i.e. attending)

19  
 20  N/A  No impact  Slight Impact  Moderate Impact  Large Impact  
 21

22 25. Feedback from faculty evaluations

23  
 24  N/A  No impact  Slight Impact  Moderate Impact  Large Impact  
 25

26 26. Feedback from nursing evaluations

27  
 28  N/A  No impact  Slight Impact  Moderate Impact  Large Impact  
 29

30 27. Feedback from patient evaluations

31  
 32  N/A  No impact  Slight Impact  Moderate Impact  Large Impact  
 33

**Part IV: Education about Patient Satisfaction**

34 28. How many times have you had an educational session that discussed patient satisfaction during medical school?

35  
 36  0  1  2  3  4  5 or more  
 37

38 29. How many times have you had an educational session that discussed patient satisfaction during residency?

39  
 40  0  1  2  3  4  5 or more  
 41

42 30. If you have attended an educational session on patient satisfaction, check all that apply.

- 43  
 44  Resident lecture (i.e. noon conference, grand rounds, sub-specialty conference, etc.)  
 45  Medical student lecture  
 46  Workshop on patient safety at a local or national meeting  
 47  Hospital orientation  
 48  I have never attended a lecture on patient satisfaction  
 49

50 31. Please answer the following: I feel confident that my patients are satisfied with the care I provide.

51  
 52  Strongly disagree  Disagree  Neutral  Agree  Strongly agree  
 53  
 54  
 55  
 56  
 57  
 58  
 59  
 60

**Thank you for taking the time to complete this survey. Your opinion matters!!**

1  
2  
3  
4  
5  
6  
7  
8  
9  
10  
11  
12  
13  
14  
15  
16  
17  
18  
19  
20  
21  
22  
23  
24  
25  
26  
27  
28  
29  
30  
31  
32  
33  
34  
35  
36  
37  
38  
39  
40  
41  
42  
43  
44  
45  
46  
47  
48  
49  
50  
51  
52  
53  
54  
55  
56  
57  
58  
59  
60

For peer review only

STROBE Statement—Checklist of items that should be included in reports of *cohort studies*

|                              | Item No | Recommendation                                                                                                                                                                                               |
|------------------------------|---------|--------------------------------------------------------------------------------------------------------------------------------------------------------------------------------------------------------------|
| <b>Title and abstract</b>    | 1       | (a) Indicate the study's design with a commonly used term in the title or the abstract<br><br><b>-Page 1</b>                                                                                                 |
|                              |         | (b) Provide in the abstract an informative and balanced summary of what was done and what was found<br><br><b>-Page 3</b>                                                                                    |
| <b>Introduction</b>          |         |                                                                                                                                                                                                              |
| Background/rationale         | 2       | Explain the scientific background and rationale for the investigation being reported<br><br><b>-Page 5</b>                                                                                                   |
| Objectives                   | 3       | State specific objectives, including any prespecified hypotheses<br><br><b>-Page 5</b>                                                                                                                       |
| <b>Methods</b>               |         |                                                                                                                                                                                                              |
| Study design                 | 4       | Present key elements of study design early in the paper<br><br><b>-Page 5</b>                                                                                                                                |
| Setting                      | 5       | Describe the setting, locations, and relevant dates, including periods of recruitment, exposure, follow-up, and data collection<br><br><b>-Page 5-6</b>                                                      |
| Participants                 | 6       | (a) Give the eligibility criteria, and the sources and methods of selection of participants. Describe methods of follow-up<br><br><b>-Page 5-7</b>                                                           |
|                              |         | (b) For matched studies, give matching criteria and number of exposed and unexposed<br><br><b>Page: Not applicable</b>                                                                                       |
| Variables                    | 7       | Clearly define all outcomes, exposures, predictors, potential confounders, and effect modifiers. Give diagnostic criteria, if applicable<br><br><b>-Page 5-7</b>                                             |
| Data sources/<br>measurement | 8*      | For each variable of interest, give sources of data and details of methods of assessment (measurement). Describe comparability of assessment methods if there is more than one group<br><br><b>-Page 6-7</b> |

|    |                        |     |                                                                                                                                                                                                   |
|----|------------------------|-----|---------------------------------------------------------------------------------------------------------------------------------------------------------------------------------------------------|
| 1  |                        |     |                                                                                                                                                                                                   |
| 2  |                        |     |                                                                                                                                                                                                   |
| 3  | Bias                   | 9   | Describe any efforts to address potential sources of bias                                                                                                                                         |
| 4  |                        |     |                                                                                                                                                                                                   |
| 5  |                        |     | <b>-Page 5-7</b>                                                                                                                                                                                  |
| 6  |                        |     |                                                                                                                                                                                                   |
| 7  | Study size             | 10  | Explain how the study size was arrived at                                                                                                                                                         |
| 8  |                        |     |                                                                                                                                                                                                   |
| 9  |                        |     | <b>-Page 5</b>                                                                                                                                                                                    |
| 10 |                        |     |                                                                                                                                                                                                   |
| 11 | Quantitative variables | 11  | Explain how quantitative variables were handled in the analyses. If applicable, describe which groupings were chosen and why                                                                      |
| 12 |                        |     |                                                                                                                                                                                                   |
| 13 |                        |     | <b>Page: Not applicable</b>                                                                                                                                                                       |
| 14 |                        |     |                                                                                                                                                                                                   |
| 15 | Statistical methods    | 12  | (a) Describe all statistical methods, including those used to control for confounding                                                                                                             |
| 16 |                        |     |                                                                                                                                                                                                   |
| 17 |                        |     | <b>-Page 7</b>                                                                                                                                                                                    |
| 18 |                        |     |                                                                                                                                                                                                   |
| 19 |                        |     | (b) Describe any methods used to examine subgroups and interactions                                                                                                                               |
| 20 |                        |     |                                                                                                                                                                                                   |
| 21 |                        |     | <b>-Page 7</b>                                                                                                                                                                                    |
| 22 |                        |     |                                                                                                                                                                                                   |
| 23 |                        |     | (c) Explain how missing data were addressed                                                                                                                                                       |
| 24 |                        |     |                                                                                                                                                                                                   |
| 25 |                        |     | <b>Page: Not applicable</b>                                                                                                                                                                       |
| 26 |                        |     |                                                                                                                                                                                                   |
| 27 |                        |     | (d) If applicable, explain how loss to follow-up was addressed                                                                                                                                    |
| 28 |                        |     |                                                                                                                                                                                                   |
| 29 |                        |     | <b>Page: Not applicable</b>                                                                                                                                                                       |
| 30 |                        |     |                                                                                                                                                                                                   |
| 31 |                        |     | (e) Describe any sensitivity analyses                                                                                                                                                             |
| 32 |                        |     |                                                                                                                                                                                                   |
| 33 |                        |     | <b>Page: Not applicable</b>                                                                                                                                                                       |
| 34 |                        |     |                                                                                                                                                                                                   |
| 35 | <b>Results</b>         |     |                                                                                                                                                                                                   |
| 36 | Participants           | 13* | (a) Report numbers of individuals at each stage of study—eg numbers potentially eligible, examined for eligibility, confirmed eligible, included in the study, completing follow-up, and analysed |
| 37 |                        |     |                                                                                                                                                                                                   |
| 38 |                        |     | <b>-Page 7</b>                                                                                                                                                                                    |
| 39 |                        |     |                                                                                                                                                                                                   |
| 40 |                        |     | (b) Give reasons for non-participation at each stage                                                                                                                                              |
| 41 |                        |     |                                                                                                                                                                                                   |
| 42 |                        |     | <b>Page: Not applicable</b>                                                                                                                                                                       |
| 43 |                        |     |                                                                                                                                                                                                   |
| 44 |                        |     | (c) Consider use of a flow diagram                                                                                                                                                                |
| 45 |                        |     |                                                                                                                                                                                                   |
| 46 |                        |     | <b>Page: Not applicable</b>                                                                                                                                                                       |
| 47 |                        |     |                                                                                                                                                                                                   |
| 48 |                        |     | (a) Give characteristics of study participants (eg demographic, clinical, social) and information on exposures and potential confounders                                                          |
| 49 |                        |     |                                                                                                                                                                                                   |
| 50 | Descriptive data       | 14* |                                                                                                                                                                                                   |
| 51 |                        |     | <b>-Page 7</b>                                                                                                                                                                                    |
| 52 |                        |     |                                                                                                                                                                                                   |
| 53 |                        |     | (b) Indicate number of participants with missing data for each variable of interest                                                                                                               |
| 54 |                        |     |                                                                                                                                                                                                   |
| 55 |                        |     |                                                                                                                                                                                                   |
| 56 |                        |     |                                                                                                                                                                                                   |
| 57 |                        |     |                                                                                                                                                                                                   |
| 58 |                        |     |                                                                                                                                                                                                   |
| 59 |                        |     |                                                                                                                                                                                                   |
| 60 |                        |     |                                                                                                                                                                                                   |

|                          |     |                                                                                                                                                                                                              |
|--------------------------|-----|--------------------------------------------------------------------------------------------------------------------------------------------------------------------------------------------------------------|
|                          |     | -Page 7                                                                                                                                                                                                      |
|                          |     | (c) Summarise follow-up time (eg, average and total amount)                                                                                                                                                  |
|                          |     | Page: Not applicable                                                                                                                                                                                         |
| Outcome data             | 15* | Report numbers of outcome events or summary measures over time                                                                                                                                               |
|                          |     | -Page 7-8                                                                                                                                                                                                    |
| Main results             | 16  | (a) Give unadjusted estimates and, if applicable, confounder-adjusted estimates and their precision (eg, 95% confidence interval). Make clear which confounders were adjusted for and why they were included |
|                          |     | -Page 7-8                                                                                                                                                                                                    |
|                          |     | (b) Report category boundaries when continuous variables were categorized                                                                                                                                    |
|                          |     | -Page 7-8                                                                                                                                                                                                    |
|                          |     | (c) If relevant, consider translating estimates of relative risk into absolute risk for a meaningful time period                                                                                             |
|                          |     | Page: Not applicable                                                                                                                                                                                         |
| Other analyses           | 17  | Report other analyses done—eg analyses of subgroups and interactions, and sensitivity analyses                                                                                                               |
|                          |     | Page: Not applicable                                                                                                                                                                                         |
| <b>Discussion</b>        |     |                                                                                                                                                                                                              |
| Key results              | 18  | Summarise key results with reference to study objectives                                                                                                                                                     |
|                          |     | -Page 8-9                                                                                                                                                                                                    |
| Limitations              | 19  | Discuss limitations of the study, taking into account sources of potential bias or imprecision. Discuss both direction and magnitude of any potential bias                                                   |
|                          |     | -Page 9                                                                                                                                                                                                      |
| Interpretation           | 20  | Give a cautious overall interpretation of results considering objectives, limitations, multiplicity of analyses, results from similar studies, and other relevant evidence                                   |
|                          |     | -Page 9                                                                                                                                                                                                      |
| Generalisability         | 21  | Discuss the generalisability (external validity) of the study results                                                                                                                                        |
|                          |     | -Page 9                                                                                                                                                                                                      |
| <b>Other information</b> |     |                                                                                                                                                                                                              |
| Funding                  | 22  | Give the source of funding and the role of the funders for the present study and, if applicable, for the original study on which the present article is based                                                |
|                          |     | -Page 10                                                                                                                                                                                                     |



1  
2  
3  
4  
5 \*Give information separately for exposed and unexposed groups.  
6  
7

8 **Note:** An Explanation and Elaboration article discusses each checklist item and gives methodological background  
9 and published examples of transparent reporting. The STROBE checklist is best used in conjunction with this article  
10 (freely available on the Web sites of PLoS Medicine at <http://www.plosmedicine.org/>, Annals of Internal Medicine  
11 at <http://www.annals.org/>, and Epidemiology at <http://www.epidem.com/>). Information on the STROBE Initiative is  
12 available at <http://www.strobe-statement.org>.  
13  
14  
15  
16  
17  
18  
19  
20  
21  
22  
23  
24  
25  
26  
27  
28  
29  
30  
31  
32  
33  
34  
35  
36  
37  
38  
39  
40  
41  
42  
43  
44  
45  
46  
47  
48  
49  
50  
51  
52  
53  
54  
55  
56  
57  
58  
59  
60

# BMJ Open

## Assessing Residents' Knowledge of Patient satisfaction: A Cross-sectional Study at a Large Academic Medical Center

|                                 |                                                                                                                                                                                                                                                                                                                                                                                                           |
|---------------------------------|-----------------------------------------------------------------------------------------------------------------------------------------------------------------------------------------------------------------------------------------------------------------------------------------------------------------------------------------------------------------------------------------------------------|
| Journal:                        | <i>BMJ Open</i>                                                                                                                                                                                                                                                                                                                                                                                           |
| Manuscript ID                   | bmjopen-2017-017100.R1                                                                                                                                                                                                                                                                                                                                                                                    |
| Article Type:                   | Research                                                                                                                                                                                                                                                                                                                                                                                                  |
| Date Submitted by the Author:   | 07-Jul-2017                                                                                                                                                                                                                                                                                                                                                                                               |
| Complete List of Authors:       | Stewart, Diana; Baylor College of Medicine, Internal Medicine and Pediatrics; Michael E. DeBakey VA Medical Center<br>Dang, B.N.; Michael E. DeBakey VA Medical Center; Baylor College of Medicine, Section of Health Services Research<br>Wells Trautner, Barbara<br>Cai, Cecilia ; Baylor College of Medicine<br>Torres, Sergio; Baylor College of Medicine<br>Turner, Teri; Baylor College of Medicine |
| <b>Primary Subject Heading</b>: | Medical education and training                                                                                                                                                                                                                                                                                                                                                                            |
| Secondary Subject Heading:      | Medical management                                                                                                                                                                                                                                                                                                                                                                                        |
| Keywords:                       | Quality in health care < HEALTH SERVICES ADMINISTRATION & MANAGEMENT, INTERNAL MEDICINE, MEDICAL EDUCATION & TRAINING, PAEDIATRICS                                                                                                                                                                                                                                                                        |
|                                 |                                                                                                                                                                                                                                                                                                                                                                                                           |

SCHOLARONE™  
Manuscripts

Only

**Title:** Assessing Residents' Knowledge of Patient satisfaction: A Cross-sectional Study at a Large Academic Medical Center

**Authors:** Diana E. Stewart, MD, MBA<sup>1,3,4</sup>, Bich N. Dang, MD<sup>1,2,3</sup>, Barbara Trautner, MD, Ph. D<sup>1,2,3</sup>, Cecilia Cai<sup>1</sup>, Sergio Torres, MD<sup>1</sup>, Teri Turner, MD, MPH, M. Ed<sup>4,5</sup>

**Author Affiliations:** <sup>1</sup>Section of General Internal Medicine, and <sup>2</sup>Section of Health Services Research, Department of Medicine, Baylor College of Medicine, Houston, Texas, USA.

<sup>3</sup>Michael E. DeBakey Veteran Affairs Medical Center, Houston, Texas, USA.

<sup>4</sup>Department of Pediatrics, Baylor College of Medicine, Houston, Texas, USA

<sup>5</sup>Center for Research, Innovation, and Scholarship in Medical Education, Texas Children's Hospital, Houston, Texas, USA.

**Author Roles:** **Diana Stewart, MD, MBA** is an assistant professor and hospitalist, Department of Pediatrics-Hospital Medicine and Department of Internal Medicine, Baylor College of Medicine in Houston, TX. **Bich N. Dang, MD** is an assistant professor in the Department of Medicine-Section of Infectious Disease, Baylor College of Medicine and a clinical investigator with the Center for Innovations in Quality, Effectiveness and Safety at the Michael E. DeBakey VA Medical Center in Houston, TX. **Barbara W. Trautner, MD, PhD** is an infectious diseases clinician-investigator focused on prevention of healthcare associated infections and antibiotic stewardship with the Center for Innovations in Quality, Effectiveness and Safety at the Michael E. DeBakey VA Medical Center and Department of Medicine, Baylor College of Medicine in Houston, TX. **Cecilia Cai** is a medical student at Baylor College of Medicine, Houston, Texas. **Sergio Torres, MD** is an assistant professor and hospitalist, Department of Internal Medicine, Baylor College of Medicine, Houston, TX. **Teri Turner, MD, MPH, M. Ed** is an associate professor, Department of Pediatrics at Baylor College of Medicine, and director, Center for Research, Innovation, and Scholarship in Medical Education, Texas Children's Hospital, Houston, Texas.

**Contributors:** Obtained funding: DS and TT. Study concept and questionnaire design: DS, BD, BT, CC, ST, TT. Acquisition of data: DS, CC, TT. Analysis and interpretation of data: DS, BD, BT, TT. All authors participated in writing the manuscript, reviewed it for content, take responsibility for the integrity of the data and accuracy of the data analysis, and approved the final version.

**Key words:** Quality improvement, graduate medical education, patient satisfaction, patient experience

**Acknowledgements:** The authors thank Dr. Lee Ligon, Center for Research, Innovation and Scholarship, Department of Pediatrics, Baylor College of Medicine, for editorial assistance.

We presented an earlier version of the manuscript as a poster at the Baylor College of Medicine Quality Improvement Symposium in May 2015.

Word count for structured abstract: 293

Word count for manuscript: 2941

**Corresponding Author Information:**

Diana Stewart, MD, MBA

Assistant Professor

1102 Bates Street, FC 1860

Houston, TX 77030

Office Phone: 832-824-5447

Fax: 832-825-5424

E-mail: [anukwuem@bcm.edu](mailto:anukwuem@bcm.edu)

## Abstract

### Objectives

Patient satisfaction impacts healthcare quality and outcomes. Residents play an important role in patient satisfaction at academic institutions. This study aims to assess residents' patient satisfaction knowledge and determine which learning experiences contributed to their knowledge acquisition.

### Settings

This study was conducted at a health science university in a large, urban, tertiary-care academic medical center in the United States.

### Participants

All residents from internal medicine (n= 185) and pediatrics (n=156) were asked to participate.

### Design

Residents completed a survey from April 2013 to December 2013 that assessed: (1) knowledge of factors that impact patient satisfaction and (2) learning experiences that may have contributed to their understanding of the drivers of patient satisfaction (e.g. experiential (personal or clinical) or didactics). Trainees identified the importance of factors in determining patient satisfaction on a 5-point Likert scale; answers were compiled into a knowledge score. The score was correlated with prior personal/clinical experience and didactics.

### Results

Of the 341 residents, 247 (72%) completed the survey. No difference was found in knowledge among training levels or residency programs. More than 50% incorrectly thought physician board certification, patient's education, patient's income, and physician's age impacted satisfaction. Personal experience, through hospitalization of a relative or friend, was correlated with higher knowledge (67% vs. 71%,  $p=.03$ ). Ninety-nine percent (n=238) stated peer observation, and all stated faculty feedback impacted their patient satisfaction knowledge. Seventy-seven percent (n=185) had attended didactics on satisfaction, but attendance did not correlate with higher scores.

### Conclusions

Our study showed trainees have a few gaps in their patient satisfaction knowledge, and attending past educational sessions on patient satisfaction did not correlate with higher knowledge scores. Our data suggests that academic centers should leverage residents' personal experiences, their observations of peers, and faculty feedback to enhance patient satisfaction knowledge.

### Strengths and Limitations of this Study

- Residents serve a dual role as providers and learners in academic settings and can greatly influence hospital quality metrics, specifically patient satisfaction. However, few studies have assessed residents' knowledge of what drives overall patient satisfaction or determined which types of learning experiences correlate with residents' acquisition of knowledge.
- Recognizing gaps in residents' knowledge of patient satisfaction allows hospital administrators and academic institutions to develop targeted, practical, and sustainable interventions to augment trainee knowledge and improve patient care, experience, and reimbursement.
- The study was performed at a large health sciences university with multiple educational clinical sites in a single academic medical center.
- Residents' knowledge scores were not correlated with clinical performance, including provider satisfaction scores or patient evaluation of residents, due to the anonymity of the survey.

## Background

Patient satisfaction is an important component of patient-centered care; it is linked to healthcare quality and associated with improved compliance and adherence.<sup>1-5</sup> Patient satisfaction and patient experience have received increasing emphasis in healthcare institutions in the United States (US) since the Affordable Care Act (a comprehensive healthcare reform act in the United States enacted in 2010), as a hospital's reimbursement is impacted by the value of care it provides rather than traditional fee for service. The "value" is calculated by the hospital's value-based total performance score, which includes several domains, one of which is patient satisfaction.<sup>6,7</sup> Although value-based care purchasing applies to only the Center for Medicare and Medicaid Services (CMS), other private payers have added satisfaction scores to their pay-for-performance measures.<sup>6</sup> For CMS, 25% of value-based purchasing will be based on the results of Hospital Consumer Assessment of Healthcare Providers and Systems (HCAHPS), an instrument to assess patient satisfaction.<sup>8-10</sup> With such emphasis on payment and the link to patient satisfaction and improved patient outcomes, it is incumbent upon all caregivers, particularly physicians in training, to understand what contributes to patients being satisfied with their care.

Many factors, such as responsiveness, communication, and interpersonal manner of caregivers, are positive determinants, or drivers, of patient satisfaction; however, whether trainees are aware of these factors remains unclear.<sup>2</sup> Functioning as both learners and providers, residents are important to the framework, quality, and outcomes of the health care delivered in an academic setting, specifically patient satisfaction.<sup>11-12</sup> Residents may have been taught some components of patient satisfaction in medical school. However, teaching and learning are not synonymous; and, therefore, the information may not have been retained.<sup>13-16</sup> Previous studies have assessed interventions targeting residents to improve patient satisfaction, such as generalized education and incentives, but the literature regarding residents' current knowledge of patient satisfaction is sparse.<sup>10</sup> To develop practical, cost-effective, sustainable interventions that benefit the trainee as well as the institution, understanding the gaps in residents' knowledge regarding drivers or positive determinants of patient satisfaction is a critical and necessary first step to changing their practice. The primary study aim was to assess residents' knowledge of factors strongly correlated with patient satisfaction, termed *drivers*. A secondary aim was to determine which types of learning experiences (didactic, personal, or clinical) most strongly correlate with residents' knowledge.

## Methods

### *Setting and Participants*

This study was conducted at a large, urban health sciences university in a tertiary-care academic medical center in Houston, Texas, USA. All residents from internal medicine (n= 185) and pediatrics (n=156), which comprised approximately 40% of the resident staff in our training institutions, were asked to participate. Residents do not train in one primary university-affiliated training hospital; rather, they rotate through five affiliated institutions. They receive diverse exposure to outpatient and inpatient care across private, federal (Veterans Affairs) and county hospitals.

### *Participant Exposure to Patient Satisfaction Metrics*

Patient satisfaction data at the affiliated institutions are collected by a CMS-approved third-party vendor, a private organization whose questionnaires are used by more than 7000 facilities in the US to

1  
2  
3 survey patients regarding their experiences in receiving health care at the institution.<sup>10,17</sup> Residents'  
4 exposure to these data vary between rotation and sites, and is difficult to quantify due to their rotation  
5 schedules. Residents rotate through different inpatient or outpatient sites every four weeks, while the  
6 patient experience data are usually reviewed monthly or quarterly.  
7

### 8 9 *Survey Instrument*

10  
11 A 31-item survey was developed through review of patient satisfaction literature, validated surveys and  
12 our prior work.<sup>2,18-24</sup> The questionnaire focused on three concepts: (1) knowledge of factors that  
13 influence patient satisfaction, (2) personal and clinical experiences that contribute to a resident's  
14 satisfaction knowledge, and (3) prior educational sessions (didactics) received related to patient  
15 satisfaction. Crow et. al reviewed 139 international articles and 127 data sets and concluded that  
16 determinants of patient satisfaction can be broken down into two groups: characteristics of the  
17 healthcare delivery system and patient experience.<sup>2</sup> Patient experience can be a surrogate marker of  
18 patient satisfaction; therefore, current validated surveys that assesses patient satisfaction via patient  
19 experience were also reviewed for themes and important determinants of patient satisfaction. The  
20 validated surveys were the Hospital CAHPS (HCAHPS) survey, Clinician and Group CAHPS (CG-CAHPS) for  
21 outpatient use, and Patient Satisfaction Questionnaire (PSQ) from Rand Health.<sup>19-20</sup> The questionnaire  
22 was developed through an iterative process that incorporated a psychometrician, health services  
23 researchers, and residency program faculty. Pilot testing using a think-aloud process was conducted  
24 with a group of internal medicine residents who were not part of the study. Internal assessment and  
25 feedback from these individuals improved the clarity of the items and the general format.  
26  
27  
28

29  
30 **Knowledge of Factors Impacting Patient Satisfaction.** Questions 1-20 assessed knowledge of the factors  
31 related to patient satisfaction, using a 5-point Likert-type scale (1 = not at all important to 5 = extremely  
32 important) (See Appendix 1 for Survey Instrument). For this study, patient satisfaction knowledge will  
33 refer to knowledge of the drivers of patient satisfaction.  
34

35  
36 Based on our literature review, we identified five domains of patient satisfaction that were assessed in  
37 the knowledge portion of the survey (Table 1).<sup>2,18-24</sup> To minimize bias and limit survey length, the final  
38 survey had 11 variables consistently related to patient satisfaction and 9 non-drivers that are commonly  
39 presumed to affect satisfaction but have been shown not to be associated.<sup>2,19-24</sup> Inclusion of commonly  
40 mistaken non-drivers in the survey were done because the authors thought it was important to also  
41 know where the current misconceptions regarding patient satisfaction.  
42

43  
44 An answer was *correct* if the resident strongly identified whether the item was related to patient  
45 satisfaction (answer of 4 or 5 for true variables/drivers and an answer of 1 or 2 for the non-drivers/false  
46 variables). Other responses were deemed *incorrect* (answer of 1, 2 or 3 for true variables/drivers and an  
47 answer of 3, 4 or 5 for the non-drivers/false variables). Selection of "3" for either category was regarded  
48 as a neutral response. Scoring was dichotomized to either correct or incorrect and was reported as a  
49 proportion of 100 percent (e.g., 10 correct answers = 50%).  
50

51  
52 **Experiential Learning: Personal and Clinical Experiences.** Questions 21-27 explored personal and clinical  
53 experiences that may impact knowledge of patient satisfaction. The personal experiences focused on  
54 personal or relative's/friend's hospitalization. Clinical experiences included clinical observations of  
55 faculty and peers with patients as well as feedback from evaluations of faculty, nurses, or patients. All  
56 these experiences were assessed independently. This portion was assessed using a 4-point Likert scale  
57 (1 = no impact to 4 = large impact; 0= not applicable). The respondents were dichotomized into two  
58  
59



1  
2  
3 groups: those who had the specific experience (response of 1 to 4) and those who did not (response of  
4 not applicable). Each experience item was analyzed as a continuous variable (degree of impact) and a  
5 categorical variable (dichotomized into those who had the specific experience and those who did not).  
6 For this analysis, the degree of impact and the dichotomized responses were correlated with the  
7 knowledge score.  
8

9  
10 **Educational Sessions (Structured Didactics) on Patient Satisfaction.** Questions 28-30 explored how  
11 often residents had received prior didactics on patient satisfaction. Respondents were asked to  
12 approximate how many times they had received an education session on patient satisfaction in medical  
13 school or residency. The last question of this section assessed how these didactics were given (e.g.,  
14 lecture, workshops, or hospital orientation). Responses to this section were correlated with the  
15 knowledge score.  
16

17  
18 The final question asked residents to respond to the statement, "I am confident that my patients are  
19 satisfied with the care I provide." Responses were based on a 5-point Likert scale (1 = strongly disagree  
20 to 5 = agree). Demographic data also were collected on participants.  
21

### 22 *Survey distribution*

23  
24 A member of the research team administered an anonymous survey at resident teaching conferences  
25 from April 2013 to December 2013. Each completed survey was assigned a unique study number.  
26 Respondents were monitored to prevent duplicate submissions. Participation in the survey was  
27 voluntary, and no penalty was given for not participating; incentives were not given.  
28

### 29 *Statistical Analysis*

30  
31 Descriptive statistics were computed on demographic data. Frequencies and mean scores (including  
32 trainee year and program type) were compared using ANOVA. Point-biserial correlation was used to  
33 assess the correlation between the knowledge score and each type of learning experience (didactic or  
34 experiential [personal or clinical experiences with hospitalization]). Frequencies and means of the  
35 knowledge score stratified by type of learning experiences were also compared using ANOVA.  
36 Spearman's rho was used to assess the correlation between knowledge score and the degree of impact  
37 of the experiences. Data were analyzed using IBM SPSS Statistics version 23.  
38

39  
40 The study was approved by the Institutional Review Board and the Research and Development  
41 Committee.  
42

## 43 **Results**

44  
45 112 of 156 pediatric residents (72%) and 135 of 185 medicine residents (73%) completed the survey. We  
46 analyzed 239 surveys, excluding 8 for incomplete data. Internal medicine-pediatrics residents were  
47 grouped with the medicine residents. See Table 2 for demographics.  
48

49  
50 **Knowledge of Factors Impacting Patient Satisfaction.** Knowledge scores are shown in Table 3. The  
51 mean score was 70%. More upper-level residents incorrectly rated physician rank in medical school as a  
52 contributor to satisfaction ( $p = 0.02$ ); otherwise, there were no differences in scores among trainee  
53 levels. Additionally, no difference was noted in knowledge scores when comparing pediatrics, internal  
54  
55  
56  
57  
58  
59  
60

1  
2  
3 medicine, or med-peds (mean score ranged from 68-70%). In general, recognition of the correct drivers  
4 of patient satisfaction was high (80%), except for recognizing that patients' health status, age, and rating  
5 of the nurses' discussion about treatment are important drivers (Table 3).<sup>2</sup> More than half of all  
6 residents incorrectly reported the following were drivers of patient satisfaction: physician age, patient  
7 income, physician board certification, and patient level of education.  
8  
9

10 **Experiential learning: Personal and clinical experiences.** Of the 239 respondents, 87 (36%) had been  
11 hospitalized, and 187 (78%) had experienced hospitalization with a family member or friend.  
12 Hospitalization of a family member or friend was significantly correlated with higher knowledge of  
13 patient satisfaction drivers ( $p=.03$ ). A significant relationship was not seen when assessing a trainee's  
14 own hospitalization.  
15  
16

17 The majority stated that observing peers ( $n = 238$ ), observing supervisors ( $n = 239$ ), and receiving  
18 feedback from faculty evaluations ( $n = 233$ ) influenced their understanding of what affects patient  
19 satisfaction (99, 100, and 97%, respectively); these experiences did not correlate significantly with a  
20 higher knowledge score when dichotomized to those who had the experience compared to those who  
21 did not. When examining the level of impact (1 to 4) of these observations, higher impact ratings for  
22 faculty evaluations was the only factor that correlated with significantly higher knowledge scores, but  
23 the correlation was weak ( $p<.05$ , correlation coefficient .13; spearman rho correlation). Feedback from  
24 nurses and patients via evaluations did not significantly correlate with higher knowledge scores. Of note,  
25 only 55% ( $n=132$ ) and 56% ( $n=134$ ) of trainees reported feedback from nurses and patients, respectively,  
26 impacted their patient satisfaction knowledge.  
27  
28  
29

30 **Structured Didactics on Patient Satisfaction.** Of the 239 respondents, 185 (77%) had attended an  
31 educational session on patient satisfaction. No significant difference was found in the knowledge score  
32 of those who had attended a session compared to those who had not. Almost half (47.5%) did not  
33 attend an educational session during residency, whereas only 67% had attended a session during  
34 medical school ( $n=161$ ). Nonetheless, 88% ( $n= 211$ ) of respondents agreed or strongly agreed that their  
35 patients are satisfied with their care. There was no significant difference in knowledge score in residents  
36 who rated a higher level of confidence.  
37  
38

## 39 Discussion

40 Residents or physicians in training are important contributors to patients' experiences in academic  
41 institutions and are key determinants of patient satisfaction.<sup>4,10-12,18</sup> We conducted a study to gauge  
42 residents' knowledge of drivers of patient satisfaction. We found the mean knowledge score for all  
43 resident levels to be 70%. Interestingly, the score did not increase with training level. Residents had  
44 difficulty recognizing that personal and demographic features of patients can affect their satisfaction.  
45 Specifically, they understood that interpersonal and communication skills are important (except for  
46 discussion about treatment by nurses), but surprisingly, they thought patients cared about board scores  
47 and board certification status.  
48  
49  
50  
51

52 Identifying the most common and universally accepted drivers of patient satisfaction can provide a  
53 foundation for curricula to address trainee knowledge gaps in these areas. Knowing what residents  
54 currently know is an important first step to changing their practices.<sup>13-16</sup> Based on these results, a  
55 suggested starting point may be curricula geared towards augmenting nurse inclusion in treatment plans  
56 given this was an area of deficiency. Regarding patient features, patients with more comorbidities may  
57 have lower satisfaction scores; however, how acute illness affects satisfaction remains undetermined.<sup>2</sup>  
58  
59  
60

1  
2  
3 These patients have specific preferences based on their health status. Learning how to affectively  
4 decipher these preferences before making treatment plans is a potential focus area for future curricula.  
5  
6

7 We also investigated what factors contribute to residents' patient satisfaction knowledge to guide  
8 future educational initiatives. Most residents have not been hospitalized, which is not surprising given  
9 the age of trainees in this study (84% were younger than 30 years). Hospitalization of a family member  
10 or friend, however, resulted in a significantly higher knowledge of patient satisfaction compared to  
11 those who did not have this experience. Even though most residents had experienced the patient's  
12 perspective on hospitalization via a relative, friend, or personal hospitalization, these experiences may  
13 not be a practical approach to guide educational initiatives for trainees who did not have these  
14 experiences. A significant relationship was not seen when assessing a trainee's own hospitalization,  
15 likely due to the low number of individuals who had previously been hospitalized. On the other hand,  
16 peer and faculty observations are major ways residents are taught about patient satisfaction. Faculty  
17 role modeling is known to influence resident education, specifically shaping trainees' values, attitudes,  
18 and ethics; the modeling provided by faculty behavior is known as the hidden curriculum.<sup>25</sup> Peer  
19 observation and feedback are useful for medical learners as well, especially in the development of  
20 professionalism, teamwork, and interprofessional skills.<sup>26-29</sup> These topics may provide a potential area of  
21 focus to augment learning on patient satisfaction.  
22  
23  
24

25 We also looked at structured didactics that aim to teach residents about patient satisfaction. Although  
26 185 of 239 respondents (77%) had attended an educational session on patient satisfaction, most of  
27 these sessions were delivered in medical school, which may explain the lack of increase in knowledge  
28 with trainee years. Teaching and learning are not interchangeable, and there is a complex interplay of  
29 many factors, such as attention, cognitive load, practice, that result in knowledge being retained in long-  
30 term memory. Knowledge that is not used, rehearsed, or revisited is often forgotten. These factors may  
31 explain the lack of improvement in knowledge following a previous lecture on satisfaction.<sup>13-15</sup> The  
32 details of these didactic sessions were not addressed by our survey, thereby precluding the ability to  
33 make any comment on the content. A recent single-site survey found that bundled interventions that  
34 included didactics, real-time feedback on patient satisfaction scores, and monthly recognition of  
35 trainees with high scores resulted in improvement in patient satisfaction scores.<sup>18</sup> Moreover, didactics in  
36 patient satisfaction alone may not be sufficient to augment patient satisfaction knowledge and change  
37 physician behavior.  
38  
39  
40

#### 41 **Limitations**

42  
43 The study was performed at a single academic center, which may limit generalizability. However, the  
44 participants in this study rotate through multiple, highly diverse affiliated institutions, and the results  
45 are likely externally valid. The survey tool, although developed through an iterative process and pilot  
46 tested, has not previously been validated. The survey was however grounded in the literature and  
47 derived from validated survey measures of patient satisfaction developed for performance metrics  
48 purposes. Several questions asked the residents to recall previous learning experiences, and the results  
49 may be limited by recall bias. Another limitation is the lack of correlation with the resident's clinical  
50 performance. The anonymous nature of the survey prevented us from correlating knowledge scores,  
51 experiences, and confidence of a resident with actual provider satisfaction scores or evaluations from  
52 patients, which would have enabled us to correlate knowledge with behavior. However, as the first step  
53 in understanding the trainees' experiences, the benefit of anonymity and honesty of reporting  
54 outweighed the ability to correlate knowledge with actual clinical behavior.  
55  
56  
57  
58  
59  
60

## Conclusion

With the move towards patient-centered care, patient satisfaction and experience are core outcomes for hospitals today.<sup>6</sup> Residents are important providers of medical care in academic institutions; their daily interactions with patients impact satisfaction, hospital quality metrics, and reimbursement.<sup>4,10-12,18</sup> We demonstrated some gaps in knowledge concerning drivers of patient satisfaction that did not vary by training year. Residents' awareness of patient satisfaction was impacted by experiential learning (clinical and personal), specifically hospitalization of a close contact, peer and faculty observation, and faculty evaluations. Hospital administrators and educators should recognize didactics alone may not be sufficient to augment trainees' knowledge of factors related to patient satisfaction. More consideration should be given to the effect of peer and faculty role modeling when developing future interventions to improve satisfaction for patients cared for by resident providers.

**Contributors:** Obtained funding: DS and TT. Study concept and questionnaire design: DS, BD, BT, CC, ST, TT. Acquisition of data: DS, CC, TT. Analysis and interpretation of data: DS, BD, BT, TT. All authors participated in writing the manuscript, reviewed it for content, take responsibility for the integrity of the data and accuracy of the data analysis, and approved the final version.

**Conflict of Interest Statement:** To the best of our knowledge, the authors of this manuscript report no conflicts of interest.

**Funding:** This material is based upon work supported by the Center for Research, Innovation, and Scholarship in Medical Education in the Department of Pediatrics at Baylor College of Medicine.

**Ethics approval:** Institutional Review Board and the Veterans Affairs Research and Development Committee.

**Data sharing statement:** No additional data are available

## References

1. Barbosa C, Balp M, Kulich K, et al. A Literature Review to Explore the Link between Treatment Satisfaction and Adherence, Compliance, and Persistence. *Patient Preference and Adherence* 2012;6:39-48.
2. Crow R, Gage H, Hampson S, et al. The Measurement of Satisfaction with Healthcare: Implications for Practice from a Systematic Review of the Literature. *Health Technol Assess* 2002; 6(32): 1-244.
3. Schneider J., Kaplan S.H., Greenfield S., et al. Better Physician-patient Relationships are Associated with Higher Reported Adherence to Antiretroviral Therapy in Patients with HIV Infection. *J Gen Intern Med* 2004; 19(11): 1096-103.
4. Van der Leeuw R, Lombarts K, Arah O, Heineman MJ. A Systematic Review of the Effects of Residency Training on Patient Outcomes. *BMC Medicine*. 2012; 10:65.
5. Fenton JJ, Jerant AF, Bertakis KD, Franks P. The cost of satisfaction: a national study of patient satisfaction, health care utilization, expenditures, and mortality. *Arch Intern Med* 2012;172(5):405-11.

- 1  
2  
3 6. Kassutto SM, Shah RJ. Patient Satisfaction: Why and How Patients Grade You and Your Pulmonary  
4 Practice. *Chest* 2015;148(3):833–8.  
5
- 6  
7 7. Conway P. Value-driven health care: Implications for hospitals and hospitalists. *J Hosp Med*  
8 2009;4(8):507–11  
9
- 10  
11 8. Lindsay RW. Linking Reimbursement to Patient Satisfaction: Is the Tail Wagging the Dog? *JAMA Facial*  
12 *Plast Surg.* 2017 Feb 23. [Epub ahead of print]  
13
- 14 9. Jha AK<sup>1</sup>, Orav EJ, Zheng J, Epstein AM. Patients' perception of hospital care in the United States. *N Engl*  
15 *J Med.* 2008 Oct 30;359(18):1921-31. Resnick AS<sup>1</sup>, Disbot M, Wurster A, Mullen JL, Kaiser LR, Morris JB.  
16
- 17  
18 10. Contributions of Surgical Residents to Patient Satisfaction: Impact of Residents Beyond Clinical Care.  
19 2008 May-Jun;65(3):243-52  
20
- 21 11. Dalia S and Schiffman F.J. Who's My Doctor? First-Year Residents and Patient Care: Hospitalized  
22 Patients' Perception of Their "Main Physician". *J Grad Med Educ* 2010; 2(2): 201-205.  
23
- 24 12. Griffith C, Rich E, Hillson S, et al. Internal Medicine Residency Training and Outcomes. *J Gen Intern*  
25 *Med.* 1997; 12 (6):390-396.  
26
- 27  
28 13. Brown, P. C., Roediger, H. L., McDaniel, M. A. Make it stick. Harvard University Press. Cambridge,  
29 Massachusetts. 2014  
30
- 31 14. Schunk, D. H. Learning theories. 6<sup>th</sup> edition. New Jersey. Prentice Hall Inc. 2011  
32
- 33 15. Ericsson, K. A. "Acquisition and maintenance of medical expertise: A perspective from the expert-  
34 performance approach with deliberate practice." *Academic Medicine* 90.11 (2015): 1471-1486.  
35
- 36 16. Young, J. Q., Van Merriënboer, J., Durning, S., Ten Cate, O. (2014). Cognitive load theory:  
37 Implications for medical education: AMEE guide no. 86. *Medical teacher*, 36(5), 371-384.  
38
- 39 17. Press Ganey. <http://www.pressganey.com>. Accessed April 23, 2017.  
40
- 41  
42 18. Banka G, Edgington S, Kyulo N, et. al. Improving patient satisfaction through physician education,  
43 feedback, and incentives. *J Hosp Med.* 2015 Aug;10(8):497-502.  
44
- 45 19. HCAHPS Center for Medicare and Medicaid Services. HCAHPS: Patients' Perspectives of Care Survey.  
46 [https://www.cms.gov/Medicare/Quality-Initiatives-Patient-Assessment-](https://www.cms.gov/Medicare/Quality-Initiatives-Patient-Assessment-Instruments/HospitalQualityInits/HospitalHCAHPS.html)  
47 [Instruments/HospitalQualityInits/HospitalHCAHPS.html](https://www.cms.gov/Medicare/Quality-Initiatives-Patient-Assessment-Instruments/HospitalQualityInits/HospitalHCAHPS.html). Accessed October 5, 2015.  
48
- 49  
50 20. Marshall, Grant N., and Ron D. Hays. The patient satisfaction questionnaire short-form (PSQ-18).  
51 *Rand.org*;1994.  
52
- 53 21. Kane Robert L. Satisfaction with Care. In: Kane R and Radosevich D. *Conducting Health Outcomes*  
54 *Research*. Sudbury: Jones and Bartlett Learning: 2011: 159-197.  
55  
56  
57  
58  
59  
60

1  
2  
3 22. Dang BN, Westbrook RA, Hartman C, Giordano TP. Retaining HIV patients in care: the role of initial  
4 patient care experiences. AIDS and Behavior. In press.  
5

6  
7 23. Dang BN, Westbrook RA, Black WC, Rodriguez-Barradas MC, Giordano TP. Examining the link  
8 between patient satisfaction and adherence to HIV care: A structural equation model. PLoS ONE. Jan  
9 2013;8(1): e54729.  
10

11 24. Dang BN, Westbrook RA, Rodriguez-Barradas MC, Giordano TP. Identifying drivers of overall  
12 satisfaction in patients receiving HIV primary care: A cross-sectional study. PLoS ONE. Aug 2012;7(8):  
13 e42980.  
14

15  
16 25. Boerebach B, Lombarts K, Keijzer C, et. al. The Teacher, the Physician and the Person: How Faculty's  
17 Teaching Performance Influences Their Role Modeling. PLoS One. 2012; 7(3): e32089  
18

19  
20 26. De la Cruz MS, Kopec MT, Wimsatt LA. Resident Perceptions of Giving and Receiving Peer-to-Peer  
21 Feedback. J Grad Med Educ 2015;7(2):208–13.  
22

23 27. Bree K, Whicker SA, Fromme HB, et. al. Residents-as-Teachers Publications: What Can Programs  
24 Learn From the Literature When Starting a New or Refining an Established Curriculum? J Grad Med Educ.  
25 2014 June; 6(2): 237–248.  
26  
27  
28  
29  
30  
31  
32  
33  
34  
35  
36  
37  
38  
39  
40  
41  
42  
43  
44  
45  
46  
47  
48  
49  
50  
51  
52  
53  
54  
55  
56  
57  
58  
59  
60



Table 1. Domains of Patient Satisfaction and Linked Survey Question

| Driver Domains                                 | Abbreviated Survey Question              | Percentage Correct (95% CI) |
|------------------------------------------------|------------------------------------------|-----------------------------|
| Accessibility, Convenience, and Responsiveness | Responsiveness of ancillary staff        | 94.1% (90.592% to 96.627%)  |
| Communication                                  | Physician explanations                   | 96.7% (94.853% to 98.976%)  |
|                                                | Nurse willingness to listen              | 96.2% (93.203% to 98.148%)  |
|                                                | Nurse explanations                       | 80.3% (74.931% to 85.007%)  |
|                                                | Physician listening                      | 97.1% (94.293% to 98.710%)  |
|                                                | Discussion about treatment by nurses     | 67.4% (61.224% to 73.086%)  |
| Interpersonal Manner of Caregiver              | Courtesy and respect from nurses         | 92.9% (89.078% to 95.661%)  |
|                                                | Courtesy and respect from physicians     | 96.2% (93.203% to 98.148%)  |
| Personal Factors of Patient                    | Poor health status of patient            | 55.6% (49.300% to 61.861%)  |
|                                                | Age of patient                           | 15.1% (10.942% to 20.026%)  |
| Technical Quality and Care from Doctors        | Thoroughness and Competence of physician | 87.4% (82.783% to 91.210%)  |

Table 2. Demographics of Participants

| Post-graduate year (PGY)         | N (%)      |
|----------------------------------|------------|
| PGY-1                            | 118 (49.4) |
| PGY-2                            | 62 (25.9)  |
| PGY-3 and 4                      | 59 (24.7)  |
| Residency Program                | N (%)      |
| Internal Medicine                | 118 (49.4) |
| Pediatrics                       | 96 (40.2)  |
| Medicine/Pediatrics              | 14 (5.9)   |
| Other <sup>a</sup>               | 11 (4.6)   |
| Age <sup>b</sup>                 | N (%)      |
| ≤ 29                             | 201 (84.1) |
| > 29                             | 37 (15.5)  |
| Gender <sup>b</sup>              | N (%)      |
| Male                             | 95 (39.7)  |
| Female                           | 143 (59.8) |
| Ethnicity <sup>c</sup>           | N (%)      |
| Hispanic                         | 17 (7)     |
| Black                            | 11 (4.6)   |
| White                            | 118 (49.4) |
| Asian                            | 88 (37)    |
| Other                            | 5 (2)      |
| Additional training <sup>b</sup> | N (%)      |
| None                             | 206 (86.6) |
| MPH                              | 8 (3.4)    |
| MBA                              | 2 (0.8)    |
| Other                            | 22 (9.2)   |

<sup>a</sup>This category includes anesthesia, family medicine, surgery, and emergency medicine.

<sup>b</sup>One respondent did not answer.

<sup>c</sup>Two respondents did not answer this question and 2 respondents selected multiple categories.

Table 3. Results of Patient Satisfaction Knowledge Survey

| Driver or Non-Driver | Abbreviated Survey Question              | Percentage Correct (95% CI) |
|----------------------|------------------------------------------|-----------------------------|
| Driver               | Poor health status of patient            | 55.6% (49.300% to 61.861%)  |
|                      | Physician explanations                   | 96.7% (94.853% to 98.976%)  |
|                      | Responsiveness of ancillary staff        | 94.1% (90.592% to 96.627%)  |
|                      | Thoroughness and Competence of physician | 87.4% (82.783% to 91.210%)  |
|                      | Nurse willingness to listen              | 96.2% (93.203% to 98.148%)  |
|                      | Nurse explanations                       | 80.3% (74.931% to 85.007%)  |
|                      | Courtesy and respect from nurses         | 92.9% (89.078% to 95.661%)  |
|                      | Courtesy and respect from physicians     | 96.2% (93.203% to 98.148%)  |
|                      | Physician listening                      | 97.1% (94.293% to 98.710%)  |
|                      | Age of patient                           | 15.1% (10.942% to 20.026%)  |
|                      | Discussion about treatment by nurses     | 67.4% (61.224% to 73.086%)  |
| Non-driver           | Physician USMLE score                    | 92.9% (89.078% to 95.661%)  |
|                      | Income of patient                        | 48.5% (42.236% to 54.871%)  |
|                      | Physician age                            | 29.3% (23.780% to 35.296%)  |
|                      | Medical school attended                  | 74.1% (68.220% to 79.317%)  |
|                      | Board certification status of physician  | 44.8% (38.547% to 51.119%)  |
|                      | Education level of patient               | 20.9% (16.117% to 26.425%)  |
|                      | Physician rank in medical school         | 90.4% (86.129% to 93.651%)  |
|                      | Gender of patient                        | 64.4% (58.208% to 70.315%)  |
| Gender of physician  | 52.3% (45.960% to 58.587%)               |                             |



Table 1. Domains of Patient Satisfaction and Linked Survey Question

| Driver Domains                                 | Abbreviated Survey Question              | Percentage Correct (95% CI) |
|------------------------------------------------|------------------------------------------|-----------------------------|
| Accessibility, Convenience, and Responsiveness | Responsiveness of ancillary staff        | 94.1% (90.592% to 96.627%)  |
| Communication                                  | Physician explanations                   | 96.7% (94.853% to 98.976%)  |
|                                                | Nurse willingness to listen              | 96.2% (93.203% to 98.148%)  |
|                                                | Nurse explanations                       | 80.3% (74.931% to 85.007%)  |
|                                                | Physician listening                      | 97.1% (94.293% to 98.710%)  |
|                                                | Discussion about treatment by nurses     | 67.4% (61.224% to 73.086%)  |
| Interpersonal Manner of Caregiver              | Courtesy and respect from nurses         | 92.9% (89.078% to 95.661%)  |
|                                                | Courtesy and respect from physicians     | 96.2% (93.203% to 98.148%)  |
| Personal Factors of Patient                    | Poor health status of patient            | 55.6% (49.300% to 61.861%)  |
|                                                | Age of patient                           | 15.1% (10.942% to 20.026%)  |
| Technical Quality and Care from Doctors        | Thoroughness and Competence of physician | 87.4% (82.783% to 91.210%)  |

Table 2. Demographics of Participants

| Post-graduate year (PGY)         | N (%)      |
|----------------------------------|------------|
| PGY-1                            | 118 (49.4) |
| PGY-2                            | 62 (25.9)  |
| PGY-3 and 4                      | 59 (24.7)  |
| Residency Program                | N (%)      |
| Internal Medicine                | 118 (49.4) |
| Pediatrics                       | 96 (40.2)  |
| Medicine/Pediatrics              | 14 (5.9)   |
| Other <sup>a</sup>               | 11 (4.6)   |
| Age <sup>b</sup>                 | N (%)      |
| ≤ 29                             | 201 (84.1) |
| > 29                             | 37 (15.5)  |
| Gender <sup>b</sup>              | N (%)      |
| Male                             | 95 (39.7)  |
| Female                           | 143 (59.8) |
| Ethnicity <sup>c</sup>           | N (%)      |
| Hispanic                         | 17 (7)     |
| Black                            | 11 (4.6)   |
| White                            | 118 (49.4) |
| Asian                            | 88 (37)    |
| Other                            | 5 (2)      |
| Additional training <sup>b</sup> | N (%)      |
| None                             | 206 (86.6) |
| MPH                              | 8 (3.4)    |
| MBA                              | 2 (0.8)    |
| Other                            | 22 (9.2)   |

<sup>a</sup>This category includes anesthesia, family medicine, surgery, and emergency medicine.

<sup>b</sup>One respondent did not answer.

<sup>c</sup>Two respondents did not answer this question and 2 respondents selected multiple categories.

Table 3. Results of Patient Satisfaction Knowledge Survey

| Driver or Non-Driver | Abbreviated Survey Question              | Percentage Correct (95% CI) |
|----------------------|------------------------------------------|-----------------------------|
| Driver               | Poor health status of patient            | 55.6% (49.300% to 61.861%)  |
|                      | Physician explanations                   | 96.7% (94.853% to 98.976%)  |
|                      | Responsiveness of ancillary staff        | 94.1% (90.592% to 96.627%)  |
|                      | Thoroughness and Competence of physician | 87.4% (82.783% to 91.210%)  |
|                      | Nurse willingness to listen              | 96.2% (93.203% to 98.148%)  |
|                      | Nurse explanations                       | 80.3% (74.931% to 85.007%)  |
|                      | Courtesy and respect from nurses         | 92.9% (89.078% to 95.661%)  |
|                      | Courtesy and respect from physicians     | 96.2% (93.203% to 98.148%)  |
|                      | Physician listening                      | 97.1% (94.293% to 98.710%)  |
|                      | Age of patient                           | 15.1% (10.942% to 20.026%)  |
|                      | Discussion about treatment by nurses     | 67.4% (61.224% to 73.086%)  |
| Non-driver           | Physician USMLE score                    | 92.9% (89.078% to 95.661%)  |
|                      | Income of patient                        | 48.5% (42.236% to 54.871%)  |
|                      | Physician age                            | 29.3% (23.780% to 35.296%)  |
|                      | Medical school attended                  | 74.1% (68.220% to 79.317%)  |
|                      | Board certification status of physician  | 44.8% (38.547% to 51.119%)  |
|                      | Education level of patient               | 20.9% (16.117% to 26.425%)  |
|                      | Physician rank in medical school         | 90.4% (86.129% to 93.651%)  |
|                      | Gender of patient                        | 64.4% (58.208% to 70.315%)  |
|                      | Gender of physician                      | 52.3% (45.960% to 58.587%)  |

## Appendix 1: Survey Instrument

We are conducting a research study to measure residents' awareness of factors that can influence patient satisfaction. Residents, like you, are important providers of medical care in academic institutions, and as such have an impact on patient satisfaction. Given the important role you play in patient care, we want to learn what you believe affects the satisfaction of your patients with the care you provide. For pediatric patients, the survey refers to parent satisfaction only.

**Part I: Tell us about you.**

1. What year are you in residency?

- PGY-1  
 PGY-2  
 PGY-3  
 PGY-4  
 Other (specify) \_\_\_\_\_

4. What gender are you?

- Male  
 Female

2. Type of residency program

- Internal Medicine  
 Pediatrics  
 Internal Medicine-Pediatrics  
 Preliminary Program  
 Transitional Program  
 Surgery  
 Obstetrics and Gynecology  
 Other (specify) \_\_\_\_\_

5. Are you of Hispanic or Latino origin?

- Yes  
 No

3. What is your age range?

- Under 25  
 25-29  
 30-34  
 35 and over

6. What is your race? (Mark all that apply)

- Black or African American  
 White  
 Asian  
 Other (specify) \_\_\_\_\_

7. Do you have additional graduate degrees?

- No  
 MPH  
 MBA  
 Other (specify) \_\_\_\_\_

**Part II: Understanding Drivers of Patient Satisfaction**

Think about the factors listed below that may influence the satisfaction of patients with the care you provide. How important or unimportant do you consider each of the following influences on the satisfaction of your patients with your care?

|                                                         |                      |                    |           |                |                     |
|---------------------------------------------------------|----------------------|--------------------|-----------|----------------|---------------------|
| 1. Ranking of medical school that physician attended    | Not at all Important | Slightly Important | Important | Very Important | Extremely Important |
| 2. Poor health status of patient                        | Not at all Important | Slightly Important | Important | Very Important | Extremely Important |
| 3. Physician explaining tests, treatments, diagnosis    | Not at all Important | Slightly Important | Important | Very Important | Extremely Important |
| 4. Board certification status of physician              | Not at all Important | Slightly Important | Important | Very Important | Extremely Important |
| 5. Responsiveness of ancillary staff to patient's needs | Not at all Important | Slightly Important | Important | Very Important | Extremely Important |
| 6. Level of education of patient                        | Not at all Important | Slightly Important | Important | Very Important | Extremely Important |
| 7. Thoroughness and competence of physician             | Not at all Important | Slightly Important | Important | Very Important | Extremely Important |
| 8. Nurses willingness to listen to patient              | Not at all Important | Slightly Important | Important | Very Important | Extremely Important |
| 9. Physician rank in medical school                     | Not at all Important | Slightly Important | Important | Very Important | Extremely Important |
| 10. Explanations provided by nurses                     | Not at all Important | Slightly Important | Important | Very Important | Extremely Important |
| 11. Courtesy and respect from nurses                    | Not at all Important | Slightly Important | Important | Very Important | Extremely Important |
| 12. USMLE score of physician                            | Not at all Important | Slightly Important | Important | Very Important | Extremely Important |
| 13. Income level of patient                             | Not at all Important | Slightly Important | Important | Very Important | Extremely Important |
| 14. Age of physician                                    | Not at all Important | Slightly Important | Important | Very Important | Extremely Important |
| 15. Courtesy and respect from physician                 | Not at all Important | Slightly Important | Important | Very Important | Extremely Important |
| 16. Listening skills of physician                       | Not at all Important | Slightly Important | Important | Very Important | Extremely Important |
| 17. Age of patient                                      | Not at all Important | Slightly Important | Important | Very Important | Extremely Important |
| 18. Gender of patient                                   | Not at all Important | Slightly Important | Important | Very Important | Extremely Important |
| 19. Gender of physician                                 | Not at all Important | Slightly Important | Important | Very Important | Extremely Important |
| 20. Discussions about treatment provided by nurse       | Not at all Important | Slightly Important | Important | Very Important | Extremely Important |

**Part III: Personal Experiences**

1 Which of the following experiences have added to your understanding of what affects patients' satisfaction  
 2 with the care you provide? If you have not personally had any of the experiences below, please select N/A  
 3 (not applicable).  
 4

5  
 6 21. Your own hospitalization  
 7

8  N/A  No impact  Slight Impact  Moderate Impact  Large Impact  
 9

10 22. Hospitalization of a family member or friend  
 11

12  N/A  No impact  Slight Impact  Moderate Impact  Large Impact  
 13

14 23. Observation of your peer's interaction with patients (i.e. other interns or residents)  
 15

16  N/A  No impact  Slight Impact  Moderate Impact  Large Impact  
 17

18 24. Observation of supervisor's interactions with patients (i.e. attending)  
 19

20  N/A  No impact  Slight Impact  Moderate Impact  Large Impact  
 21

22 25. Feedback from faculty evaluations  
 23

24  N/A  No impact  Slight Impact  Moderate Impact  Large Impact  
 25

26 26. Feedback from nursing evaluations  
 27

28  N/A  No impact  Slight Impact  Moderate Impact  Large Impact  
 29

30 27. Feedback from patient evaluations  
 31

32  N/A  No impact  Slight Impact  Moderate Impact  Large Impact  
 33

**Part IV: Education about Patient Satisfaction**

34  
 35  
 36  
 37  
 38 28. How many times have you had an educational session that discussed patient satisfaction during medical school?  
 39

40  0  1  2  3  4  5 or more  
 41

42  
 43 29. How many times have you had an educational session that discussed patient satisfaction during residency?  
 44

45  0  1  2  3  4  5 or more  
 46

47 30. If you have attended an educational session on patient satisfaction, check all that apply.  
 48

- 49  Resident lecture (i.e. noon conference, grand rounds, sub-specialty conference, etc.)  
 50  Medical student lecture  
 51  Workshop on patient safety at a local or national meeting  
 52  Hospital orientation  
 53  I have never attended a lecture on patient satisfaction  
 54

55  
 56 31. Please answer the following: I feel confident that my patients are satisfied with the care I provide.  
 57

58  Strongly disagree  Disagree  Neutral  Agree  Strongly agree  
 59  
 60

**Thank you for taking the time to complete this survey. Your opinion matters!!**

1  
2  
3  
4  
5  
6  
7  
8  
9  
10  
11  
12  
13  
14  
15  
16  
17  
18  
19  
20  
21  
22  
23  
24  
25  
26  
27  
28  
29  
30  
31  
32  
33  
34  
35  
36  
37  
38  
39  
40  
41  
42  
43  
44  
45  
46  
47  
48  
49  
50  
51  
52  
53  
54  
55  
56  
57  
58  
59  
60

For peer review only

STROBE Statement—Checklist of items that should be included in reports of *cohort studies*

|                              | Item No | Recommendation                                                                                                                                                                                                                                                     |
|------------------------------|---------|--------------------------------------------------------------------------------------------------------------------------------------------------------------------------------------------------------------------------------------------------------------------|
| <b>Title and abstract</b>    | 1       | (a) Indicate the study's design with a commonly used term in the title or the abstract<br><br>-Page 1                                                                                                                                                              |
|                              |         | (b) Provide in the abstract an informative and balanced summary of what was done and what was found<br><br>-Page 3                                                                                                                                                 |
| <b>Introduction</b>          |         |                                                                                                                                                                                                                                                                    |
| Background/rationale         | 2       | Explain the scientific background and rationale for the investigation being reported<br><br>-Page 5                                                                                                                                                                |
| Objectives                   | 3       | State specific objectives, including any prespecified hypotheses<br><br>-Page 5                                                                                                                                                                                    |
| <b>Methods</b>               |         |                                                                                                                                                                                                                                                                    |
| Study design                 | 4       | Present key elements of study design early in the paper<br><br>-Page 5                                                                                                                                                                                             |
| Setting                      | 5       | Describe the setting, locations, and relevant dates, including periods of recruitment, exposure, follow-up, and data collection<br><br>-Page 5-6                                                                                                                   |
| Participants                 | 6       | (a) Give the eligibility criteria, and the sources and methods of selection of participants. Describe methods of follow-up<br><br>-Page 5-7<br><br>(b) For matched studies, give matching criteria and number of exposed and unexposed<br><br>Page: Not applicable |
| Variables                    | 7       | Clearly define all outcomes, exposures, predictors, potential confounders, and effect modifiers. Give diagnostic criteria, if applicable<br><br>-Page 5-7                                                                                                          |
| Data sources/<br>measurement | 8*      | For each variable of interest, give sources of data and details of methods of assessment (measurement). Describe comparability of assessment methods if there is more than one group<br><br>-Page 6-7                                                              |

|                        |     |                                                                                                                                                                                                                                                                                                                                                                                                                                                         |
|------------------------|-----|---------------------------------------------------------------------------------------------------------------------------------------------------------------------------------------------------------------------------------------------------------------------------------------------------------------------------------------------------------------------------------------------------------------------------------------------------------|
| Bias                   | 9   | Describe any efforts to address potential sources of bias<br><b>-Page 5-7</b>                                                                                                                                                                                                                                                                                                                                                                           |
| Study size             | 10  | Explain how the study size was arrived at<br><b>-Page 5</b>                                                                                                                                                                                                                                                                                                                                                                                             |
| Quantitative variables | 11  | Explain how quantitative variables were handled in the analyses. If applicable, describe which groupings were chosen and why<br><b>Page: Not applicable</b>                                                                                                                                                                                                                                                                                             |
| Statistical methods    | 12  | (a) Describe all statistical methods, including those used to control for confounding<br><b>-Page 7</b><br>(b) Describe any methods used to examine subgroups and interactions<br><b>-Page 7</b><br>(c) Explain how missing data were addressed<br><b>Page: Not applicable</b><br>(d) If applicable, explain how loss to follow-up was addressed<br><b>Page: Not applicable</b><br>(e) Describe any sensitivity analyses<br><b>Page: Not applicable</b> |
| <b>Results</b>         |     |                                                                                                                                                                                                                                                                                                                                                                                                                                                         |
| Participants           | 13* | (a) Report numbers of individuals at each stage of study—eg numbers potentially eligible, examined for eligibility, confirmed eligible, included in the study, completing follow-up, and analysed<br><b>-Page 7</b><br>(b) Give reasons for non-participation at each stage<br><b>Page: Not applicable</b><br>(c) Consider use of a flow diagram<br><b>Page: Not applicable</b>                                                                         |
| Descriptive data       | 14* | (a) Give characteristics of study participants (eg demographic, clinical, social) and information on exposures and potential confounders<br><b>-Page 7</b><br>(b) Indicate number of participants with missing data for each variable of interest                                                                                                                                                                                                       |



|                          |     |                                                                                                                                                                                                              |
|--------------------------|-----|--------------------------------------------------------------------------------------------------------------------------------------------------------------------------------------------------------------|
|                          |     | -Page 7                                                                                                                                                                                                      |
|                          |     | (c) Summarise follow-up time (eg, average and total amount)                                                                                                                                                  |
|                          |     | Page: Not applicable                                                                                                                                                                                         |
| Outcome data             | 15* | Report numbers of outcome events or summary measures over time                                                                                                                                               |
|                          |     | -Page 7-8                                                                                                                                                                                                    |
| Main results             | 16  | (a) Give unadjusted estimates and, if applicable, confounder-adjusted estimates and their precision (eg, 95% confidence interval). Make clear which confounders were adjusted for and why they were included |
|                          |     | -Page 7-8                                                                                                                                                                                                    |
|                          |     | (b) Report category boundaries when continuous variables were categorized                                                                                                                                    |
|                          |     | -Page 7-8                                                                                                                                                                                                    |
|                          |     | (c) If relevant, consider translating estimates of relative risk into absolute risk for a meaningful time period                                                                                             |
|                          |     | Page: Not applicable                                                                                                                                                                                         |
| Other analyses           | 17  | Report other analyses done—eg analyses of subgroups and interactions, and sensitivity analyses                                                                                                               |
|                          |     | Page: Not applicable                                                                                                                                                                                         |
| <b>Discussion</b>        |     |                                                                                                                                                                                                              |
| Key results              | 18  | Summarise key results with reference to study objectives                                                                                                                                                     |
|                          |     | -Page 8-9                                                                                                                                                                                                    |
| Limitations              | 19  | Discuss limitations of the study, taking into account sources of potential bias or imprecision. Discuss both direction and magnitude of any potential bias                                                   |
|                          |     | -Page 9                                                                                                                                                                                                      |
| Interpretation           | 20  | Give a cautious overall interpretation of results considering objectives, limitations, multiplicity of analyses, results from similar studies, and other relevant evidence                                   |
|                          |     | -Page 9                                                                                                                                                                                                      |
| Generalisability         | 21  | Discuss the generalisability (external validity) of the study results                                                                                                                                        |
|                          |     | -Page 9                                                                                                                                                                                                      |
| <b>Other information</b> |     |                                                                                                                                                                                                              |
| Funding                  | 22  | Give the source of funding and the role of the funders for the present study and, if applicable, for the original study on which the present article is based                                                |
|                          |     | -Page 10                                                                                                                                                                                                     |

1  
2  
3  
4  
5 \*Give information separately for exposed and unexposed groups.  
6  
7

8 **Note:** An Explanation and Elaboration article discusses each checklist item and gives methodological background  
9 and published examples of transparent reporting. The STROBE checklist is best used in conjunction with this article  
10 (freely available on the Web sites of PLoS Medicine at <http://www.plosmedicine.org/>, Annals of Internal Medicine  
11 at <http://www.annals.org/>, and Epidemiology at <http://www.epidem.com/>). Information on the STROBE Initiative is  
12 available at <http://www.strobe-statement.org>.  
13  
14  
15  
16  
17  
18  
19  
20  
21  
22  
23  
24  
25  
26  
27  
28  
29  
30  
31  
32  
33  
34  
35  
36  
37  
38  
39  
40  
41  
42  
43  
44  
45  
46  
47  
48  
49  
50  
51  
52  
53  
54  
55  
56  
57  
58  
59  
60
